# Supplementary material
Source: HighWire-hosted journal article supplement (https://jech.bmj.com/highwire/filestream/159129/field_highwire_adjunct_files/0/58Supp1Index.pdf)
Supplement: 58Supp1Index.pdf [file 58Supp1Index.pdf]

# Author index

- Abad I** see Cevallos C *et al.*
- Abad-Franch F** see Morales-Suarez-Varela M *et al.*
- Abbott R** see Nishizawa C *et al.*
- Abdelmur A** see Gomes J *et al.*
- Abeni D** see Fortes C *et al.*
- Abrams K** see Manktelow B *et al.*
- Abreu L** *et al.* Teleconsultation for accomplishment of intravenous thrombolysis in acute myocardial infarction at local emergency level in Rio de Janeiro, Brazil, **A64**
- Abreu-Lima C** see Azevedo A *et al.*
- Accordini S** see Cazzoletti L *et al.*  
see Marco R *et al.*
- Accordini S** *et al.* Life impairment due to asthma in patients from the general population. Results of the European Community Respiratory Health Survey (ECRHS) – II, **A3**
- Aceitero JMR** see Blanco GC *et al.*
- Acúrcio F** see Rozenfeld S *et al.*
- Acurcio F** see Klein C *et al.*
- Adlercreutz H** see Kilkkinen A *et al.*
- Agerbo E** *et al.* Suicide and spouses' psychiatric illness or suicide, **A3**
- Aguado I** see Fernández C *et al.*
- Aguilar M** see Morales-Suarez-Varela M *et al.*
- Ahlgren M** *et al.* Birth weight and risk of cancer, **A1**
- Ahmed S** see Roth C *et al.*
- Ahrens W** see Morales-Suarez-Varela M *et al.*  
see Pigeot I *et al.*
- Ahrens W** *et al.* Incidence of testicular tumours in car manufacturing workers, **A3**
- Aimeida M** see Macedo S *et al.*
- Alberdi JC** see Peña-Rey I *et al.*
- Alcanatara P** see Macedo M *et al.*
- Alencar G** see Almeida M *et al.*
- Alencar WK** see Santos NJS *et al.*
- Alfonso V** see Gonzalez E *et al.*
- Aljeesh Y** see Baune B *et al.*
- Allenberg J** *et al.* Peripheral arterial disease as an indicator disease for generalized atherothrombosis: results from the Getabi study, **A3**
- Allwright S** see O'Farrell A *et al.*
- Almeida C** see Rozenfeld S *et al.*
- Almeida M** *et al.* Risk factors to foetal deaths in São Paulo, Brazil, **A4**
- Almeida P** see Azevedo A *et al.*
- Almeida RL** see Mota MV *et al.*
- Almeida S** see Ramos E *et al.*
- Almeida S** *et al.* Factors associated with caesarean section in Brazil, **A64**  
Spatial analysis of cardiovascular mortality in Portugal, 1992–2000, **A4**
- Alonso A** see Sánchez-Villegas A *et al.*
- Alonso A** *et al.* Consumption of olive oil and incidence of hypertension: the SUN study, **A64**
- Alonso Á** see Martínez-González MÁ *et al.*
- Alonso JEL** see Alonso TV *et al.*
- Alonso TV** *et al.* Cardiovascular risk profiles in a cohort of new diagnosis of type 2 diabetes. Study of the Castilla y León sentinel network, **A123**
- Alotto M** see Fortes C *et al.*
- Alvarez L** see Morales-Suarez-Varela M *et al.*
- Alvelos M** see Azevedo A *et al.*
- Alves M** see Santos E *et al.*
- Alves O** *et al.* Child health care: maternal and health professional attitudes in Viana do Castelo district, Portugal, **A65**
- Alves S** *et al.* Geographical distribution of hip fractures in Portugal, 2000–2002, **A4**
- Alves V** see Santos L *et al.*
- Amaral J** *et al.* Projections of HIV/AIDS cases in Portugal, **A5**
- Amaral O** see Pereira C *et al.*
- Amaral O** *et al.* Obesity and quality of life in adolescents, **A5**
- Amaral W** see Abreu L *et al.*
- Amigoni M** see Montomoli C *et al.*
- Amorim J** see Santos L *et al.*
- Amouyel P** see Empana J *et al.*
- Ancona C** *et al.* Increasing socioeconomic inequalities in mortality, Rome 1990–2000, **A65**  
No income inequalities in 30 day mortality after coronary artery bypass graft surgery in Italy, **A5**
- Andersen A** see Zhu J *et al.*
- Andersen AMN** *et al.* Paternal age and risk of fetal death, **A43**
- Andersen PK** see Andersen AMN *et al.*
- Andrade C** see Griep R *et al.*  
see Klein C *et al.*
- Andrade F** *et al.* Quality of life of patients with oral cancer, **A65**
- Andrade L** see Barreto I *et al.*
- Andrade LOM** see Santiago AV *et al.*  
see Sucupira ACSL *et al.*
- Andrade LOM** *et al.* The Sobral survey on health, education, and quality of life of children aged 5 to 9 years in urban settings of Sobral, Brazil 1999–2000: local health policy based on epidemiological evidence, **A66**
- Andrade V** see Lima V *et al.*
- Andreoli S** *et al.* Evaluation matrix model in the Santos mental health services, **A66**
- Andreozzi V** *et al.* Comparing modelling strategies for longitudinal data: the effect of vitamin A in childhood diarrhoeal disease, **A6**
- Antonelli G** see Fortes C *et al.*
- Antoni C** see Benito-Garcia E *et al.*
- Antunes J** see Andrade F *et al.*  
see Biazevic M *et al.*  
see Jahn G *et al.*  
see Mello T *et al.*  
see Toporcov T *et al.*
- Antunes J** *et al.* Is it possible to reduce AIDS deaths without reinforcing socioeconomic inequalities in health?, **A6**
- Antunes JLF** see Casagrande ST *et al.*
- Antunes R** see Pereira C *et al.*
- Aoki M** see Tayra A *et al.*
- Arabova M** see Turnovska T *et al.*
- Aragonés G, López-Abente N** see Suárez B *et al.*
- Aragonés N** see Lope V *et al.*  
see Pérez\_Gómez B *et al.*  
see Pollán M *et al.*
- Aragonés N** see Estirado A *et al.*
- Aragones N** see Gavrilá D *et al.*
- Aranguez E** see Cevallos C *et al.*
- Araujo S** see Andreoli S *et al.*
- Arcà M** see Ancona C *et al.*  
see Marino C *et al.*
- Arcà M** *et al.* Assessing present health status and predicting future health expenditures through administrative databases, **A6**
- Arce A** *et al.* Hepatitis A, a vaccine preventable disease. Epidemiology in the region of Madrid, Spain, **A102**
- Arends L** see Mierlo L *et al.*
- Ågren A** see Manjer J *et al.*
- Armas L** see Gonzalez E *et al.*
- Arniani S** see Bianchi F *et al.*  
see Confi S *et al.*
- Aro J** see Määttänen L *et al.*
- Arós F** see Marrugat J *et al.*
- Arribas SF** see Alonso TV *et al.*
- Arshad SH** see Morales-Suarez-Varela M *et al.*
- Artama M** *et al.* Congenital structural malformations in the offspring of women with epilepsy, **A7**
- Artazcoz L** see Medina S *et al.*
- Artieda L** see Ugarte M *et al.*
- Arveiler D** see Empana J *et al.*
- Arveux P** see Morales-Suarez-Varela M *et al.*
- Ascensão P** see Martins AP *et al.*
- Assennato G** see Bisceglia L *et al.*
- Astray J** see Pollán M *et al.*
- Augusto P** see Boccolini C *et al.*
- Aurrecoechea B** see Morales-Suarez-Varela M *et al.*
- Auvinen A** see Artama M *et al.*  
see Määttänen L *et al.*

- Avagyan T** see Hakobyan M *et al.*  
see Yepiskoposyan L *et al.*
- Azenha V** *et al.* Insufficient birth weight: study of associated factors in two cohorts of newborn infants from Ribeirão Preto, Brazil, separated by a 15-year interval, **A66**
- Azenha VM** see Almeida S *et al.*  
see Oliveira ZAR *et al.*
- Azeredo M** see Pereira A *et al.*
- Azevedo A** *et al.* Heart failure symptoms and preserved systolic function: misdiagnosis or diastolic dysfunction?, **A7**  
Prevalence of structural and functional cardiac abnormalities according to factors of the metabolic syndrome, **A7**  
The prevalence of heart failure in Porto—a population based study, **A7**
- Azevedo A** see Bergantim R *et al.*
- Azevedo I** see Formiga MC *et al.*
- Baggio M** see Santos E *et al.*
- Baker R** see Khunti K *et al.*
- Bakketeig LS** see Basso O *et al.*
- Ballesteros J** *et al.* Effectiveness of respite care to decrease the psychological distress of dementia caregivers, **A66**
- Balluz L** see Brown D *et al.*
- Bamman K** see Pigeot I *et al.*
- Banegas J** see Guallar-Castillón P *et al.*
- Baneva N** see Zafirova B *et al.*
- Baranauskiene D** see Kregzdyte R *et al.*
- Barber X** see Vioque J *et al.*
- Barbieri M** see Azenha V *et al.*  
see Cortez S *et al.*  
see Saraiva M *et al.*
- Barbieri MA** see Almeida S *et al.*  
see Oliveira ZAR *et al.*
- Barbosa A** *et al.* Evolution of winter mortality 1969–2001 in Viana do Castelo, Portugal, **A67**
- Barbosa A** see Santos E *et al.*
- Barbosa M** see Alves S *et al.*
- Barcellos C** see Ramalho W *et al.*
- Barchielli A** see Bianchi F *et al.*
- Bardin-Mikolajczak A** see Lissowska J *et al.*
- Baretta E** *et al.* Prevalence of physical inactivity and associated variables: a population based study in Brazilian adults, **A67**
- Baretta M** see Baretta E *et al.*
- Baró J** see Fernández C *et al.*
- Barquero M** see Garcia N *et al.*  
see Neira P *et al.*
- Barreiro A** *et al.* Risk factors prevalence of overweight and weight loss behaviours in teenagers, **A67**
- Barreto D** see Morales-Suarez-Varela M *et al.*
- Barreto I** *et al.* The Sobral survey on health, education and quality of life of children aged 5 to 9 years in urban settings of Sobral, Ceara, Brazil, 1999–2000: referred morbidity analysis, **A8**
- Barreto ICHC** see Andrade LOM *et al.*  
see Santiago AV *et al.*  
see Sucupira ACSL *et al.*
- Barreto M** see Andreozzi V *et al.*
- Barreto ML** see Kerr-Pontes LR *et al.*
- Barrett J** see Movahedi M *et al.*
- Barros D** see Silva S *et al.*
- Barros H** see Azevedo A *et al.*  
see Bergantim R *et al.*  
see Botelho F *et al.*  
see Costa L *et al.*  
see Duarte-Ramos F *et al.*  
see Gal D *et al.*  
see Lopes C *et al.*  
see Lunet N *et al.*  
see Ramos E *et al.*  
see Santos AC *et al.*  
see Sousa S *et al.*
- Barros M** see Marin-Leon L *et al.*
- Barros T** see Morales-Suarez-Varela M *et al.*
- Bartolacci S** see Bianchi F *et al.*
- Bartolozzi F** see Federici A *et al.*  
see Rossi P *et al.*
- Bartsch H** see Chang-Claude J *et al.*
- Basso O** *et al.* Comparison of two definitions of small size at birth in relation to motor development at 6 months, **A8**
- Basta A** see Kaim I *et al.*
- Bastos F** see Pina MF *et al.*
- Bastos F** *et al.* Self management and therapy adherence in type 2 diabetics: effect of wife involvement in the educational programme, **A8**
- Batistela E** see Segurado A *et al.*
- Baumert J** see Erazo N *et al.*  
see Ladwig K *et al.*
- Baumert J** *et al.* Associations of cardiovascular risk factors with soluble adhesion molecules and cd141, **A68**  
Time trends of railway suicides in Germany from 1991 until 2000, **A68**
- Baune B** *et al.* Estimation of effectiveness of general versus selective screening of syphilis among drug users in inpatient settings, **A68**  
Results of a case–control study on potential risk factors for the development of stroke among factors of non-compliance with the therapeutic regimen in the Gaza strip, **A68**
- Baysson H** *et al.* Indoor radon exposure and risk of lung cancer: a case control study in France, **A9**
- Bazin F** see Le Pont F *et al.*
- Bazin F** *et al.* Original approach to the individual characteristics associated with forgone healthcare: a study on people who lived on income welfare in 2000, France, 2003, **A9**
- Bech B** see Ye G *et al.*
- Becher H** see Hammer G *et al.*  
see Kyobutungi C *et al.*
- Becher H** *et al.* Modelling infant mortality: a comparison of three methods to model non-proportional hazards, **A9**
- Becker-Witt C** see Brinkhaus B *et al.*  
see Jena S *et al.*
- Becker-Witt C** *et al.* Effectiveness of acupuncture treatment for chronic neck pain: the Acupuncture in Routine Care (ARC) Study, **A69**
- Bedford D** see O'Farrell A *et al.*
- Behrens T** see Heidrich J *et al.*
- Behrens T** *et al.* Difficulties in the quantification of RF exposure from appliances in analytical epidemiological studies, **A69**  
Self reported traffic density and atopic disease in children, **A69**
- Beier K** see Englert H *et al.*
- Bellemo A** see Andreoli S *et al.*
- Belleudi V** see Ancona C *et al.*
- Belmaker I** see Karakis I *et al.*
- Beltrano C** see Conti S *et al.*
- Bencko V** *et al.* Non-melanoma skin and bladder cancer incidence in relation to arsenic exposure: 20 years of observation, **A70**
- Bender R** see Baune B *et al.*
- Benes C** see Zitek K *et al.*
- Benito-Garcia E** *et al.* Socioeconomic status profoundly influences rheumatoid arthritis clinical status and outcome: a comparison of Portuguese and US patients, **A10**
- Benner A** see Becher H *et al.*
- Berg G** *et al.* Is a cohort study on workers exposed to high frequency radiation feasible?, **A70**
- Bergantim R** *et al.* Handedness and ability, **A10**
- Berglund G** see Manjer J *et al.*
- Bergman G** *et al.* Manipulative therapy for patients with shoulder complaints: results of a randomised controlled trial, **A10**
- Berisha M** see Ramadani N *et al.*
- Bermejo J** see Vizcaino V *et al.*
- Bernabei A** see Scatigna M *et al.*
- Bes-Rastrollo M** see Martínez-González MÁ *et al.*  
see Sánchez-Villegas A *et al.*
- Bettencourt P** see Azevedo A *et al.*
- Bettioli H** see Almeida S *et al.*  
see Azenha V *et al.*  
see Cortez S *et al.*  
see Oliveira ZAR *et al.*  
see Saraiva M *et al.*
- Bianchi F** *et al.* Health impact assessment (HIA) of a municipal waste incinerator near Florence, Italy, **A70**
- Biazevic M** see Michel-Crosato E *et al.*
- Biazevic M** *et al.* Trends of cervical cancer mortality in the state of Paraná, Southern Brazil, 1980–2000, **A11**
- Bielska-Lasota M** *et al.* Are the results of cervical cancer patients treatment in Poland really the lowest in Europe?, **A11**
- Bingham A** see Empana J *et al.*
- Binkova B** see Cebulska-Wasilewska A *et al.*

- Biscaia A et al.** Family doctors' job satisfaction and conditions of professional practice, **A71**
- Bisceglia L et al.** Acute effects of air pollution on human health in an industrialised urban area in Italy, **A71**
- Bischof W** see Brasche S et al.
- Bishop DT** see Movahedi M et al.
- Bjegovic V** see Jankovic S et al.
- Blagoy M** see Turnovska T et al.
- Blair A** see Fortes C et al.
- Blanco GC et al.** Surveillance on varicella in Extremadura, Spain, through the SENTRY system, **A74**
- Blettner M** see Berg G et al.  
see Lindert J et al.
- Blondel B et al.** Multiple births in the European community: differences in the onset of labour and pregnancy outcome, **A11**
- Bobak M** see Peasey A et al.  
see Perlman F et al.  
see Pikhart H et al.
- Bobak M et al.** Alcohol consumption and all cause mortality in Russian men and women: a cohort study based on the mortality of relatives, **A11**
- Boccolini C et al.** Prevalence of pacifier and nursing bottle use in children less than 1 year old in Queimados city, **A71**
- Boe J** see Morales-Suarez-Varela M et al.
- Boechat M** see de Mello R et al.
- Boehler E** see Berg G et al.
- Boice J** see Kulmala I et al.
- Boldo E** see Medina S et al.
- Bolotin A** see Karakis I et al.
- Borgia P** see Farchi S et al.  
see Federici A et al.  
see Marinacci C et al.  
see Rossi P et al.
- Borrell C** see Antunes J et al.
- Bosco J** see Segurado A et al.
- Bosco S** see Segurado A et al.
- Botelho F et al.** Coffee and gastric cancer: a community based case-control study and a meta-analysis of published data, **A71**
- Botelho JS et al.** Survey of risk factors for cardiovascular diseases among public school teenagers, **A72**
- Botelho M et al.** A new method for caries prevention in public health: efficacy of an antiseptic mouthrinse prepared with alectrim-pimenta essential oil (*Lippia sidoides* Cham), **A72**  
Popular education: syncretism and representations in Brazilians' public health, **A72**
- Bouchardy C** see Rapiti E et al.
- Brabazon E** see O'Farrell A et al.
- Brabazon E et al.** Disparity between notifiable infectious disease hospitalisations and notifications from a health board region in Ireland: a cause for concern?, **A12**
- Brady W** see Santos E et al.
- Braga J et al.** Epidemiological surveillance, disease mapping, and detection of spatial patterns in Brazil, **A12**
- Braga P** see Segurado A et al.
- Braga R** see João E et al.
- Braga R et al.** Determination of hepatitis A risk areas in region of the Duque de Caxias, Rio de Janeiro, Brazil, **A73**
- Brasche S et al.** Prevalence, causes, and health effects of dampness and mould in homes, **A12**
- Breckenkamp J** see Berg G et al.
- Brenner H** see Twardella D et al.
- Brinkhaus B** see Becker-Witt C et al.  
see Jena S et al.
- Brinkhaus B et al.** Acupuncture in routine care study (ARC): effectiveness of acupuncture in patients with allergic rhinitis, **A18**
- Brito A et al.** Adherence of patients with AIDS to treatment with highly active antiretroviral therapy (HAART): Rio Grande Do Norte, Brazil, 1999–2002, **A13**
- Briz TSH et al.** Effectiveness of tuberculosis control programme in Portugal. Epidemiological evidence from a recent independent 3 year period observation, evidence quality, and improvements needed, **A73**
- Broocks J** see Gonzalez E et al.
- Brousseau D** see Haiek L et al.
- Brown D et al.** Associations between short and long term unemployment and frequent mental distress among a national sample of men and women, **A73**
- Brown S** see Small R et al.
- Browne M** see O' Rourke K et al.
- Bruno F** see Medronho R et al.
- Brzezinski Z** see Mierzejewska E et al.
- Bugiani M** see Cazzoletti L et al.  
see Marco R et al.
- Buiatti E** see Bianchi F et al.  
see Conti S et al.
- Burden A** see Khunti K et al.
- Burden M** see Khunti K et al.
- Burgoa M** see Arce A et al.  
see Cevallos C et al.
- Burgoa M et al.** Re-emergence of syphilis in the region of Madrid, **A74**
- Burguet A** see Larroque B et al.
- Burnett R, Thun M** see Medina S et al.
- Buyken A** see Kroke A et al.
- Buziarsist J** see Demarest S et al.  
see Heyden J et al.
- Bygren L** see Grjibovski A et al.
- Caamaño F et al.** Factors associated with the decision of Spanish pharmacists to prescribe medicines and to recommend a visit to a doctor, **A74**
- Cabello L** see Arce A et al.
- Cabrita J** see Duarte-Ramos F et al.  
see Martins AP et al.
- Calado F** see Duarte-Ramos F et al.
- Calado R** see Carreira M et al.
- Calheiros J** see Moreira F et al.
- Calistet P** see Gonzalez E et al.
- Calvet G** see João E et al.
- Camargo M** see Jahn G et al.
- Camilloni L** see Farchi S et al.
- Caminada S** see Santos NJS et al.  
see Tayra A et al.
- Campos M** see Schramm J et al.
- Campos MR** see Medronho RA et al.
- Campos R** see Pereira C et al.
- Campos R et al.** Lifestyles in university students, **A100**
- Canflaca I** see Morales-Suarez-Varela M et al.
- Cans C et al.** Changes in multiple live births and cerebral palsy children over time in Europe (1980–1996), **A13**
- Cantero A** see Fernández C et al.
- Car J** see Gebaska-kuczerowska A et al.
- Caracena N** see Vizcaino V et al.
- Caranci N** see Marinacci C et al.
- Cárdaba M** see Estirado A et al.  
see Pérez-Gómez B et al.
- Cardoso M** see Moreira F et al.
- Cardy A** see Sharp L et al.
- Carmo MSN** see Kilsztajn S et al.
- Carmo R** see Lima V et al.
- Carmona J** see Macedo M et al.
- Carreira M et al.** Adolescent health survey in school, phase one A: asthma, physical exercise, and tobacco consumption, **A13**
- Carreri V** see Montomoli C et al.
- Carvalho L** see Meneghel S et al.
- Carvalho M** see Andreozzi V et al.  
see Castro M et al.
- Carvalho R** see Lunet N et al.
- Casagrande ST et al.** Meningococcal disease by *Neisseria meningitidis* b:4:p1.5 in São Paulo, Brazil over the 1986–2001 period: epidemiological and molecular aspects, **A74**
- Casali C** see Medronho R et al.
- Castilho E** see Brito A et al.
- Castilhos K** see Pires J et al.
- Castikova J** see Kyncl J et al.
- Castro CA** see Saraiva MCP et al.
- Castro M et al.** Effect of health services supply on hospital admission in Brazil, **A75**
- Castro S** see Gomes J et al.
- Catalano RF** see Nishizawa C et al.
- Catarino J** see Carreira M et al.

- Cavalcante MS** *et al.* Human immunodeficiency virus transmission from mother to infant in Fortaleza, Brazil: revealing the epidemiological situation in a capital of the northeast, **A75**
- Cavalcante S** see Tindó H *et al.*
- Cazzoletti L** see Accordini S *et al.*  
see Marco R *et al.*
- Cazzoletti L** *et al.* Adequacy of asthma treatment to GINA recommendations: an international survey, ECRHS II, **A14**
- Cebulska-Wasilewska A** *et al.* Influence of the environmental exposure to PAHs on the cellular susceptibility to the induction of oxidative type of the DNA damage, **A75**
- Ceia C** see Martins AP *et al.*
- Cerveri I** see Accordini S *et al.*  
see Cazzoletti L *et al.*  
see Marco R *et al.*
- Cesaroni G** see Marinacci C *et al.*
- Cevallos C** *et al.* Legionellosis surveillance in the region of Madrid, Spain, from 1998 to 2003, **A76**
- Chaffer P** see Rapiti E *et al.*
- Chaix B** *et al.* Investigating place effects on health: a spatial approach v the multilevel approach, **A14**  
Using measures of clustering in logistic regression to investigate contextual effects: an example on healthcare utilisation in Sweden, **A14**
- Chang-Claude J** *et al.* Does SUL1A1 genotype modify the association of active and passive smoking with breast cancer risk?, **A14**
- Chastang J** see Leclerc A *et al.*  
see Menvielle G *et al.*
- Chauvin P** see Bazin F *et al.*  
see Chaix B *et al.*  
see Le Pont F *et al.*
- Chil A** see Bielska-Lasota M *et al.*
- Chini F** see Farchi S *et al.*
- Chor D** see Fonseca M *et al.*  
see Griep R *et al.*  
see Lopes C *et al.*
- Cimaglia C** see Arcà M *et al.*
- Cioccale R** see Montomoli C *et al.*
- Cisneros M** see Garcia N *et al.*  
see Neira P *et al.*
- Clavel-Chapelon F** see Paoletti X *et al.*
- Cobos A** see Neira P *et al.*
- Coeli C** see Goes S *et al.*
- Cohen M** *et al.* Decentralisation of the actions of sanitary surveillance: identification of the agencies of sanitary surveillance of the cities in GPSM in the state of Rio de Janeiro, **A76**
- Colaço M** see Biscaia A *et al.*
- Colais P** see Arcà M *et al.*
- Coldea V** see Viragh E *et al.*
- Collares C** see Moysés M *et al.*
- Comas LG** see Vera I *et al.*
- Concolino F** see Fortes C *et al.*
- Constantinidis T** see Jelastopulu E *et al.*
- Conti S** *et al.* Epidemiological study of mortality during the summer of 2003 in Italy, **A15**  
Health observation and health reporting: findings from a pilot study in Florence, **A15**
- Cordeiro M** see Corrente J *et al.*
- Cordeiro M** *et al.* Acute diarrhoea in a reference hospital in southeast Brazil, **A15**  
Factors associated with influenza vaccination in the elderly in a town in southeastern Brazil in 2003, **A76**
- Cordoba D** see Garcia N *et al.*
- Cordoba E** see Vera I *et al.*
- Correa M** see Santos E *et al.*
- Correia M** see Silva M *et al.*
- Correia T** see Sousa S *et al.*
- Corrente J** see Cordeiro M *et al.*
- Corrente J** *et al.* Identifying groups of individuals in a population using multidimensional instruments via cluster analysis, **A16**
- Corsico A** see Accordini S *et al.*  
see Cazzoletti L *et al.*  
see Marco R *et al.*
- Cortez S** see Saraiva M *et al.*
- Cortez S** *et al.* Effect of work at early ages on the final height: a cohort study, **A16**
- Corti A** see Bianchi F *et al.*
- Costa C** see Pereira C *et al.*
- Costa L** *et al.* Self reported prevalence of rheumatic disease pathologies in a representative sample of an urban population, **A16**
- Costa MG** see Alonso TV *et al.*
- Costa R** see Formiga MC *et al.*  
see Leal R *et al.*  
see Santos L *et al.*
- Cotton S** *et al.* What lifestyle factors are associated with high risk human papilloma virus (HPV) infection in women who have had abnormal cervical smears? Results from the TOMBOLA trial, **A17**
- Coutinho ESF** see Silva KS *et al.*
- Covas M** see Marrugat J *et al.*
- Cricelli C** see Mazzaglia G *et al.*
- Croft J** see Brown D *et al.*
- Cruz M** see João E *et al.*  
see Martins AP *et al.*  
see Reis A *et al.*  
see Santos E *et al.*
- Cruz M** *et al.* SDT/AIDS prevention actions evaluation: Rio de Janeiro city case study, **A76**
- Cunha C** see Leal M *et al.*
- Cunha S** see Nogueira JR *et al.*
- Cusack S** see O' Rourke K *et al.*
- Cusimano R** see Vigotti M *et al.*
- Cutilli A** see Scatigna M *et al.*
- Czeresnia D** *et al.* The hygiene hypothesis: epidemiologic transition and disease theories new challenges, **A17**
- Czerniak A** see Shaham J *et al.*
- Czerw-Glab K** see Bielska-Lasota M *et al.*
- Dagan R** see Fraser D *et al.*
- Daghofer E** *et al.* HCV infection risk in dental practice, **A77**
- Dahlke W** see Ahrens W *et al.*
- Dallongeville J** see Empana J *et al.*
- Daltro P** see de Mello R *et al.*
- Darius H** see Allenberg J *et al.*
- Davoli M** see Ancona C *et al.*
- Dawson DA** see Nishizawa C *et al.*
- de Camargo B** see Ribeiro K *et al.*
- de Mello R** *et al.* Neonatal risk factors for respiratory morbidity in first year in very low birth weight infants, **A40**
- De Paz C** see Garcia N *et al.*
- de Souza L** see Vieira E *et al.*
- de Venanzi J** see Lemos C *et al.*
- del Alamo F** see Fernández C *et al.*
- Del Amo J** see Lumbreras-Lacarra B *et al.*
- Delobel M** see Larroque B *et al.*
- Demarest S** see Heyden J *et al.*
- Demarest S** *et al.* Unmet needs: physical disability and social support, **A77**
- Di Lallo D** *et al.* Comparison of pregnancy outcomes and utilisation of prenatal care between immigrant and Italian women, **A17**  
The beneficial effects of antenatal steroids are influenced by the early clinical conditions of preterm infants, **A78**
- Díaz MMA** see Blanco GC *et al.*
- Dias CM** see Marques-Vidal P *et al.*
- Dias P** see Azevedo A *et al.*
- Diaz C** see Morales-Suarez-Varela M *et al.*
- Dickute J** *et al.* Maternal socioeconomic status, smoking during pregnancy, and the risk of low birth weight, **A18**
- Diehm C** see Allenberg J *et al.*
- Dittrich M** see Queisser-Luft A *et al.*
- Dolk H** *et al.* Impact of multiple births on the prevalence of congenital anomalies in Europe, **A18**
- Donato F** see Panopoulou K *et al.*
- Dong Y** see Trautner C *et al.*
- Dorleans Y** see Massari V *et al.*
- Dougherty G** see Gagnon A *et al.*
- Döring A** see Ladwig K *et al.*
- Downey J** see O'Farrell A *et al.*
- Doyle M** see Khan I *et al.*
- Drachler M** see Freitas P *et al.*
- Drachler ML** see Freitas P *et al.*  
see Menegolla I *et al.*
- Draper E** see Manktelow B *et al.*
- Dreshaj S** see Fejza H *et al.*

- D'ippolito M** see João E *et al.*
- Druenkler M** *et al.* Evaluation of a rehabilitation programme for factory workers within the enterprise (Volkswagen AG, Wolfsburg, Germany), **A78**
- Drulovic J** see Pekmezovic T *et al.*
- Du Prel JB** see Icks A *et al.*
- Duarte E** see Braga J *et al.*
- Duarte-Ramos F** *et al.* A pharmacoepidemiological approach to estimate diabetes type 2 prevalence, **A19**  
Lipid profile in a community sample of Portuguese adults, **A78**
- Ducimetiere P** see Empana J *et al.*
- Duhme H** see Behrens T *et al.*
- Dumyahn TS** see Penar A *et al.*
- Dunkley A** see Khunti K *et al.*
- Dunt D** *et al.* Individual and area factors associated with GP integration in Australia: a multilevel analysis, **A19**
- Duppre N** see Matos H *et al.*
- Duran-Tauleria E** see Accordini S *et al.*
- Durazzo M** see Andrade F *et al.*
- Durga J** see Engberink M *et al.*
- Dutra M** see de Mello R *et al.*
- Egea JM** see Sánchez-Villegas A *et al.*
- Eguilaz MHR** see Sánchez-Villegas A *et al.*
- Elizabeth Y** see Vieira E *et al.*
- Ellert U** see Neuhauser HK *et al.*
- Ellert U** *et al.* Health related quality of life measured with the SF-8: results of the German National Health Telephone Survey 2002/2003, **A79**
- Elosua R** see Marrugat J *et al.*
- Elsworth G** see Dunt D *et al.*
- Elvira F** see Segurado A *et al.*
- Empana J** *et al.* Are the Framingham and Procam coronary heart disease risk functions applicable to different European populations? The prime study, **A19**
- Engberink M** *et al.* Cys282tyr mutation of the haemochromatosis gene is related to body iron status, but not to carotid intima-media thickness, **A20**
- Engel J** see Zielhuis G *et al.*
- Engel R** see Erazo N *et al.*
- Englert H** see Müller-Nordhorn J *et al.*
- Englert H** *et al.* The prevalence of erectile dysfunction using different definitions: results of the Berlin male study, **A20**
- Erazo N** see Baumert J *et al.*
- Erazo N** *et al.* Are there circumstances that differ between completed and attempted railway suicides? An analysis of 4003 cases, **A20**  
Sex differences in temporal variations of suicidal behaviour on German railways. An analyses of 40 003 cases, **A20**
- Escamilla R** see Segall-Corrêa A *et al.*
- Escobar A** see Grisi S *et al.*  
see Maranhão A *et al.*  
see Sztajn bok S *et al.*
- Escosteguy C** see Abreu L *et al.*  
see Leal R *et al.*
- Escoval A** see Amaral O *et al.*  
see Pereira C *et al.*
- Esteban J** see Vizcaino V *et al.*
- Estirado A** see Gavrila D *et al.*  
see Pérez\_Gómez B *et al.*
- Estirado A** *et al.* Risk of squamous cell skin cancer and chemicals exposure in working Swedish women, **A79**
- Evangelista CN** see Kerr-Pontes LR *et al.*
- Evans A** see Empana J *et al.*  
see Tolonen H *et al.*
- Fábio S** see Vieira E *et al.*
- Fabiani L** see Mazzaglia G *et al.*  
see Panopoulou K *et al.*  
see Scatigna M *et al.*  
see Sessa E *et al.*
- Faerstein E** see Fonseca M *et al.*  
see Griep R *et al.*  
see Lopes C *et al.*
- Fagundes F** see Leal R *et al.*
- Faia C** see Barbosa A *et al.*
- Falcão H** see Ramos E *et al.*
- Falk J** see Meneghel S *et al.*
- Farchi G** see Conti S *et al.*
- Farchi S** see Federici A *et al.*  
see Rossi P *et al.*
- Farchi S** *et al.* Different definitions of home accident mortality: a sensitivity analysis, **A21**  
Hospitalisation among injured children in road traffic and home accidents: similarities and differences, **A21**
- Farhood D** see Hosseinpoor A *et al.*
- Faria N** see Meneghel S *et al.*
- Farmer P** see Cebulska-Wasilewska A *et al.*
- Febrel C** see Burgoa M *et al.*  
see Cevallos C *et al.*
- Federici A** *et al.* Randomised controlled trial to improve the compliance to colorectal cancer screening: the general practitioners can be used as test providers, **A21**
- Feierl G** see Daghofer E *et al.*
- Fejza H** *et al.* Epidemiological features of the meningococcal sepsis in kosovo, **A79**
- Feldens L** see Pires J *et al.*
- Feldman R** see Roth C *et al.*
- Feldmeier H** see Kerr-Pontes LR *et al.*
- Fenton S** see Kelaher M *et al.*
- Fernández C** *et al.* Gender differences in prevalence and risk factors of school based hostility in Alicante, Spain, **A38**  
Headteachers' perception of school based hostility and behavioural disorders in Alicante, Spain: a qualitative approach, **A38**
- Fernández CR** see Blanco GC *et al.*
- Fernández-Jarne E** see Alonso A *et al.*  
see Sánchez-Villegas A *et al.*
- Ferrari AA** see Botelho JS *et al.*
- Ferrario M** see Tolonen H *et al.*
- Ferreira P** see Martins AP *et al.*
- Ferrer K** see Botelho M *et al.*
- Ferros I** see Lumbresas-Lacarra B *et al.*
- Ferrieres J** see Empana J *et al.*
- Ferrinho P** see Biscaia A *et al.*
- Figueiras A** see Herdeiro M *et al.*
- Filgueiras IW** see Andrade LOM *et al.*
- Filgueiras I** see Barreto I *et al.*
- Filgueiras IW** see Santiago AV *et al.*  
see Sucupira ACSL *et al.*
- Filho A** see Andreoli S *et al.*
- Filipe E** see Santos N *et al.*  
see Segurado A *et al.*
- Finnegan P** see Brabazon E *et al.*
- Finner H** see Icks A *et al.*
- Fiol M** see Marrugat J *et al.*
- Fioletta G** see Rapiti E *et al.*
- Firmo J** see Lima-Costa M *et al.*
- Fisberg M** see Botelho JS *et al.*
- Fito M** see Marrugat J *et al.*
- Flahault A** see Massari V *et al.*
- Flanagan E** see O'Farrell A *et al.*
- Fleck B** see Queisser-Luft A *et al.*
- Flint-Richter P** see Sadezki S *et al.*
- Floderus B** see Estirado A *et al.*  
see Gavrila D *et al.*
- Florek M** see Sochacka-Tatara E *et al.*
- Foglieni N** see Montomoli C *et al.*
- Fonseca M** *et al.* Relations between education, income and body mass index of employees in a university in Rio de Janeiro, Brazil: the Pró-Saúde study, **A77**
- Fonseca V** *et al.* Cord blood haemoglobin is positively associated with early postnatal growth in preterm infants, **A22**
- Forastiere F** see Fortes C *et al.*
- Ford E** see Brown D *et al.*
- Formiga M** *et al.* Exploring the relations between children mortality and socioeconomic factors in the northeast region of Brazil, **A22**
- Formiga MC** *et al.* Contraception: reproductive behaviour of women users of public health services in the city of Natal-RN, Brazil, **A79**
- Formiga PC** see Formiga MC *et al.*
- Forouzanfar M** see Hosseinpoor A *et al.*
- Forsberg B** see Medina S *et al.*
- Fortes C** *et al.* Cutaneous malignant melanoma survival: how many years of life can early diagnosis save?, **A80**  
Residential pesticides and melanoma: a case control study on cutaneous melanoma in Rome, **A1**  
Smoking is associated with increased severity of psoriasis, **A100**

- Foucher Y** see Moret L *et al.*  
**Fraga S** see Ramos E *et al.*  
**França I** see Almeida M *et al.*  
**Franek P** see Bencko V *et al.*  
**Franzon N** see Pires J *et al.*  
**Fraser D** *et al.* Anaemia as a risk factor for infectious diseases in infants and toddlers: results from a prospective study, **A22**  
**Freire M** see Formiga MC *et al.*  
**Freitas M** *et al.* Knowledge, opinions, and behaviours of a college population faced with AIDS (University of Minho and Calouste Gulbenkian Nursing School of Braga City), **A22**  
**Freitas P** *et al.* Building the hierarchical model of factors influencing type of delivery in south Brazil, **A23**  
 Perinatal morbidity associated with caesarean sections in south Brazil, **A80**  
 Social inequalities in birth—factors associated with caesarean sections among primiparae in Brazil, **A23**  
 Socioeconomic determinants of caesarean section rates in south Brazil, **A80**  
**Freixo L** see Barbosa A *et al.*  
**Friedman E** see Sadetzki S *et al.*  
**Friger M** see Karakis I *et al.*  
**Friões F** see Azevedo A *et al.*  
**Frydenberg M** see Basso O *et al.*  
**Fuchs C** see Wark P *et al.*  
**Fuente C** see Alonso A *et al.*  
 see Martínez-González MA *et al.*  
**Fusco D** see Arcà M *et al.*  
 see Marino C *et al.*  
**Gadelha A** see Schramm J *et al.*  
**Gagnon A** *et al.* Needs of refugee mothers after pregnancy—early response services (normap-ers): an example of scientific challenges in studies of migration, **A23**  
**Gaio A** see Lopes C *et al.*  
**Gal D** see Costa L *et al.*  
**Gal D** *et al.* Energy expenditure and determinants of physical activity in a Portuguese urban population, **A81**  
**Galán I** *et al.* Excess mortality in the Madrid autonomous region during the 2003 heatwave, **A81**  
**Galache P** see Galán I *et al.*  
**Galas A** *et al.* Dietary habits and stomach cancer in Poland, **A24**  
**Gama S** see Leal M *et al.*  
**Gańczak M** *et al.* Risk factors and prevention of blood borne infections in surgeons and surgical ward nurses in city and county hospitals of Pomerania, Poland, **A80**  
**Gandarillas A** see Galán I *et al.*  
**Gapski R** see Botelho M *et al.*  
**Garcia A** see Vera I *et al.*  
**Garcia N** see Neira P *et al.*  
**Garcia N** *et al.* Health inequalities: mortality in Vallecas, **A81**  
**Garcia S** see Vera I *et al.*  
**García J** see Gutiérrez A *et al.*  
**García-Cabañas A** see Lemos C *et al.*  
**García-Comas L** see Burgoa M *et al.*  
 see Cevallos C *et al.*  
**García-De La Hera M** see Lumbreras-Lacarra B *et al.*  
**García-Fernandex C** see Arce A *et al.*  
**Garganta R** see Seabra A *et al.*  
**Garrido J** see Morales-Suarez-Varela M *et al.*  
**Gashi L** see Ramadani N *et al.*  
**Gashi L** *et al.* Rapid field assessment of sexually transmitted infections in Kosovo, **A82**  
**Gauthier D** see Haiek L *et al.*  
**Gavrila D** *et al.* Occupation, electromagnetic field exposure, and risk of leukaemia, **A82**  
**Gebska-kuczerowska A** *et al.* Causes of hospitalisation in elderly patients in Poland, 2001, **A82**  
**Geleijnse J** see Engberink M *et al.*  
 see Mierlo L *et al.*  
**Geleijnse J** *et al.* Alpha omega trial: results from the pilot study, **A24**  
**Geoffroy-Perez B** see Leclerc A *et al.*  
**Gebska-Kuczerowska A** *et al.* Injuries and poisonings in elderly patients in Poland, **A24**  
**George A** see Gagnon A *et al.*  
**Giani G** see Icks A *et al.*  
 see Prel J *et al.*  
 see Rosenbauer J *et al.*  
**Gianna M** see Tayra A *et al.*  
**Gianna MC** see Santos NJS *et al.*  
**Gianrizzo L** see Di Lallo D *et al.*  
**Gil E** see Garcia N *et al.*  
 see Neira P *et al.*  
 see Pollán M *et al.*  
**Giles W** see Brown D *et al.*  
**Gilis-Januszewska A** see Szurkowska M *et al.*  
**Giovannucci E** see Wark P *et al.*  
**Gisle L** see Demarest S *et al.*  
 see Heyden J *et al.*  
**Gissler M** see Artama M *et al.*  
 see Blondel B *et al.*  
 see Klemetti R *et al.*  
**Gjessing HK** see Basso O *et al.*  
**Glazer Y** see Karakis I *et al.*  
**Gliniabaou S** see Cans C *et al.*  
**Goddon C** see Ahrens W *et al.*  
**Goeij A** see Wark P *et al.*  
**Goes S** *et al.* Probabilistic linkage between medication and surveillance databases: an application in AIDS hospital surveillance, **A83**  
**Goldani M** see Cortez S *et al.*  
 see Pires J *et al.*  
 see Saraiva M *et al.*  
**Goldbohm RA** see Wark P *et al.*  
**Goldman B** see Sadetzki S *et al.*  
**Gomes J** *et al.* Circulatory death rate areas and income population characteristics in an urban area of medium size in a southwest city of Brazil: the case of Presidente Prudente, SP, Brazil, 2000–2002, **A83**  
**Gomide M** see Kerr-Pontes LR *et al.*  
**Gonçalves I** see Barbosa A *et al.*  
**Gonzalez A** see Morales-Suarez-Varela M *et al.*  
 see Mudender F *et al.*  
**Gonzalez A** *et al.* Sexual behaviour of young people/adults studying state education in Maputo, Mozambique, **A93**  
**Gonzalez E** *et al.* A local approach towards the elimination of tuberculosis in a rural municipality of Cuba, 1995–2001, **A83**  
**Goral A** see Shaham J *et al.*  
**Goryński P** see Gebska-Kuczerowska A *et al.*  
**Gorynski P** see Gebska-kuczerowska A *et al.*  
**Gotlieb S** see Laurenti R *et al.*  
**Gözl M** see Bencko V *et al.*  
**Graamans K** see Zielhuis G *et al.*  
**Grabert M** see Icks A *et al.*  
 see Prel J *et al.*  
 see Rosenbauer J *et al.*  
**Gracie R** see Pina MF *et al.*  
**Graeve J** see Sartor F *et al.*  
**Graham JW** see Nishizawa C *et al.*  
**Granja L** *et al.* Comparison of a self-administrated questionnaire and an interactive software for assessment of fruit and vegetable intake in adolescents, **A25**  
**Grant BF** see Nishizawa C *et al.*  
**Grassi P** see Freitas P *et al.*  
**Griep R** *et al.* Social network and self reported health condition among public officers of a university: Pró-Saúde Study results, **A83**  
**Grisi S** see Maranhão A *et al.*  
 see Silva A *et al.*  
 see Sztajn bok S *et al.*  
**Grisi S** *et al.* Referred morbidity of the 1 month to 19 year old population living in a neighborhood of São Paulo city, Brazil, **A84**  
**Grijbovski A** *et al.* Sociodemographic and lifestyle determinants of birth weight in north west Russia, **A25**  
**Grobbee D** see Heijden G *et al.*  
 see Mierlo L *et al.*  
**Groenier K** see Bergman G *et al.*  
**Guallar-Castillón P** *et al.* Physical activity and quality of life in the older adult population of Spain, **A25**  
**Guasticchi G** see Di Lallo D *et al.*  
 see Farchi S *et al.*  
 see Federici A *et al.*  
 see Rossi P *et al.*  
**Gubert M** see Segall-Corrêa A *et al.*  
**Guenel P** see Morales-Suarez-Varela M *et al.*  
**Guibu I** see Tayra A *et al.*  
**Guibu IA** see Tayra A *et al.*

- Guillen M** see Vioque J *et al.*  
**Gurvich R** see Shaham J *et al.*  
**Gustavsson P** see Estirado A *et al.*  
 see Gavriła D *et al.*  
 see Lope V *et al.*  
 see Pérez\_Gómez B *et al.*  
**Gutiérrez A** *et al.* Invasive pneumococcal disease in an autonomous region of Madrid, Spain, 1998–2001, **A84**  
**Gutiérrez Á** see Burgoa M *et al.*  
**Gutierrez MRP** see Oliveira ZAR *et al.*  
**Guzmán A** see Suárez B *et al.*
- Haas B** see Empana J *et al.*  
**Haberl R** see Allenberg J *et al.*  
**Hahmann H** see Twardella D *et al.*  
**Hahn S** see Kroke A *et al.*  
**Haiek L** *et al.* Understanding the complexities of breastfeeding behaviour: rates and shifts in patterns during the first six months of life in the Montérégie region, Québec, **A26**  
 Use of an informatised tool to measure evidence-based maternity care policies and practices in a hospital setting, **A26**  
**Hakama M** see Määttänen L *et al.*  
**Hakobyan M** see Yepiskoposyan L *et al.*  
**Hakobyan M** *et al.* Trends in infant mortality rate during the past decade in Armenia, **A26**  
**Hammer G** *et al.* Risk factors for childhood mortality in sub-saharan africa—a comparison of survey data form information from a demographic surveillance system, **A27**  
 Risk factors for childhood mortality in sub-Saharan Africa: a comparison of data from a national survey and information from a demographic surveillance system, **A84**  
**Hamouda O** see Poggensee G *et al.*  
**Hansen K** see Andersen AMN *et al.*  
**Hardell L** see Morales-Suarez-Varela M *et al.*  
**Harris C** see Dunt D *et al.*  
**Hartmann T** see Brasche S *et al.*  
**Hasselmann M** see Reichenheim M *et al.*  
**Haukka J** *et al.* The dynamics of antipsychotic drug usage and hospitalisation in follow up of schizophrenia patients, **A27**  
**Havlickova M** see Kyncl J *et al.*  
**Hawkins JD** see Nishizawa C *et al.*  
**Heerbeek N** see Zielhuis G *et al.*  
**Heeren T** see Nishizawa C *et al.*  
**Hegarty K** see Taft A *et al.*  
**Heidrich J** *et al.* Attitudes of physicians towards the treatment of risk factors in patients with coronary heart disease: how do physicians comply with clinical guidelines?, **A85**  
**Heijden G** see Bergman G *et al.*  
**Heijden G** *et al.* Off pump coronary artery bypass surgery: a meta-analysis of randomised trials, **A58**  
**Heinz E** see Brasche S *et al.*  
**Hemminki E** see Klemetti R *et al.*  
**Herdeiro M** *et al.* Physicians' attitudes and adverse drug reaction reporting: a case-control study in Portugal, **A85**  
**Henderson AJ** see Morales-Suarez-Varela M *et al.*  
**Hernández-Aguado I** see Lumberras-Lacarra B *et al.*  
**Hernández-García AB** see Sánchez-Villegas A *et al.*  
**Hernandez G** see Morales-Suarez-Varela M *et al.*  
**Hesse E** see Demarest S *et al.*  
 see Heyden J *et al.*  
**Heyden J** *et al.* Impact of parental smoking on children's medical consumption: a population based study, **A58**  
**Higgins R** see Raymond N *et al.*  
**Hill KG** see Nishizawa C *et al.*  
**Hingson RW** see Nishizawa C *et al.*  
**Hjollund N** see Zhu J *et al.*  
**Hoffman D** see Fonseca V *et al.*  
**Hoffmann W** see Behrens T *et al.*  
**Holl R** see Icks A *et al.*  
 see Prel J *et al.*  
**Holl RW** see Rosenbauer J *et al.*  
**Hosseinpoor A** *et al.* Contribution of air pollutants in hospitalisation due to angina pectoris and cor pulmonale in Tehran city: a time series study, **A27**  
**Hölmich L** see Kulmala I *et al.*  
**Howland J** see Nishizawa C *et al.*  
**Hudala-Klecha J** see Bielska-Lasota M *et al.*
- Huk T** see Druenkler M *et al.*  
**Hurtado I** see Lumberras-Lacarra B *et al.*
- Ibáñez B** see Ugarte M *et al.*  
**Ibarra N** see Ballesteros J *et al.*  
**Icks A** see Prel J *et al.*  
 see Rosenbauer J *et al.*  
**Icks A** *et al.* Social inequality: risk for hospitalisation in diabetic children and adolescents, **A85**  
**Ifrikhar K** see O' Rourke K *et al.*  
**Imbernon E** see Leclerc A *et al.*  
**Inglis J** see Sharp L *et al.*  
**Iniesta D** see Galán I *et al.*  
**Insúa E** see Gutiérrez A *et al.*  
**Irala-Estévez J** see Martínez-González MA *et al.*  
**Iriso A** see Neira P *et al.*  
 see Pollán M *et al.*  
**Isojarvi J** see Artama M *et al.*  
**Izarra C** see Peña-Rey I *et al.*  
**Izarra C** *et al.* Description of abortions in women residents of the community of Madrid, **A85**
- Jacek R** see Penar A *et al.*  
**Jahn A** see Hammer G *et al.*  
**Jahn A** *et al.* Routine antenatal care in Germany: suspicious screening results and their implications from the users' perspective, **A27**  
**Jahn G** *et al.* Increasing inequalities in the distribution of dental caries in Brazil, **A86**  
**Jais J** see Le Mignot L *et al.*  
 see Richard J *et al.*  
 see Said M *et al.*  
**Jamal LF** see Tayra A *et al.*  
**Jamanka A** see Nishizawa C *et al.*  
**Jankovic S** *et al.* Assessing the burden of disease and injury in Serbia using disability adjusted life years, **A86**  
**Jansen E** see Heijden G *et al.*  
**Janson C** see Accordini S *et al.*  
**Janzon L** see Manjer J *et al.*  
**Jarebinski M** see Pekmezovic T *et al.*  
**Jarrín-Vera I** see Lumberras-Lacarra B *et al.*  
**Jarvis D** see Accordini S *et al.*  
**Jaspersen D** see Kulig M *et al.*  
**Jedrychowski W** see Galas A *et al.*  
 see Kaim I *et al.*  
 see Kiełtyka A *et al.*  
 see Penar A *et al.*  
 see Sochacka-Tatara E *et al.*  
 see Steindorf K *et al.*  
**Jelastopulu E** *et al.* Health situation in Greece and comparison with other European countries, **A86**  
**Jena S** see Becker-Witt C *et al.*  
 see Brinkhaus B *et al.*  
**Jena S** *et al.* Different kinds of missing value imputations and their effects on outcome analyses of a randomised interventional study, **A28**  
**Jeni S** see Turnovska T *et al.*  
**João E** *et al.* Vertical transmission of HIV in Rio de Janeiro, Brazil, **A28**  
**Johansen P** see Morales-Suarez-Varela M *et al.*  
**Johansson R** see Manjer J *et al.*  
**John U** see Völzke H *et al.*  
**Johnson A** see Cans C *et al.*  
**Johnson KC** *et al.* The accumulating evidence on passive and active exposure to tobacco smoke and breast cancer risk, **A28**  
**Jong B** see Bergman G *et al.*  
**Jorge M** see Koizumi M *et al.*  
 see Laurenti R *et al.*  
**Jougla E** see Leclerc A *et al.*  
**Juan L** see Campos R *et al.*  
**Juel K** *et al.* Mortality in Denmark in an international context, **A87**  
**Junior J** see Braga J *et al.*  
**Juusela H** see Määttänen L *et al.*
- Kaaks R** see Manjer J *et al.*  
**Kabakian-Khasholian T** *et al.* Birthing practices and experiences: evidence from the Arab region, **A28**  
**Kaim I** *et al.* Relationship of maternal body mass index (BMI) and weight gain during pregnancy to pregnancy outcome, **A87**  
**Kaiser R** see Medina S *et al.*  
**Kalaveshi A** see Gashi L *et al.*

- Kalediene R** see Starkuviene S *et al.*
- Kalina I** see Cebulska-Wasilewska A *et al.*
- Kalinowski P** *et al.* Epidemiology of viral hepatitis in Poland in the years 1997–2003, **A87**
- Kaminski M** see Larroque B *et al.*
- Kampman E** see van Leeuwen A *et al.*
- Karakis I** *et al.* Adverse health effects of emissions from regional industrial complex in an urban population, **A87**
- Karlev L** see Morales-Suarez-Varela M *et al.*
- Karwat ID** see Kalinowski P *et al.*
- Kasagi F** see Sauvaget C *et al.*
- Katus H** see Müller-Nordhorn J *et al.*
- Kavlakov G** see Turnovska T *et al.*
- Keil U** see Behrens T *et al.*  
see Heidrich J *et al.*  
see Tolonen H *et al.*
- Kelahr M** *et al.* The relationship between education, discrimination, and health in a British study, **A29**  
Unemployment, contraceptive behaviour and reproductive outcomes among young Australian women, **A88**
- Kerr-Pontes L** see Cavalcante MS *et al.*
- Kerr-Pontes LR** see Mota MV *et al.*
- Kerr-Pontes LR** *et al.* Risk factors associated with leprosy in north east Brazil: a case-control study in four endemic area, **A29**
- Khan I** *et al.* The demographics of horse riding injuries in southeastern Ireland, **A88**
- Khunti K** *et al.* Randomised primary care based evaluation of rapid results in glycated haemoglobin testing in type 2 diabetes: the right study, **A29**
- Kieltyka A** *et al.* Environmental factors and *Helicobacter pylori* infection in children and youth in Poland: population based study, **A30**
- Kilkkinen A** *et al.* Serum enterolactone concentration is not associated with breast cancer risk in a nested case-control study, **A88**
- Kilsztajn S** *et al.* Black victims of homicides in metropolitan São Paulo, 2000, **A88**
- Kisic D** see Pekmezovic T *et al.*
- Klaukka T** see Haukka J *et al.*
- Klein C** see Rozenfeld S *et al.*
- Klein C** *et al.* Medicine use profile of Brazilian retired citizens: national sample, **A89**
- Klemetti R** *et al.* IVF multiples do better than IVF singletons compared with naturally conceived children, **A89**
- Klemm E** see Schaefer T *et al.*
- Knurowski T** *et al.* Health status and the quality of life among elderly in Poland and Croatia, **A89**
- Kocev N** see Jankovic S *et al.*
- Koenig W** see Baumert J *et al.*
- Koizumi M** *et al.* Hospital morbidity and mortality caused by external causes: how much the government pays for this assistance, **A90**
- Kok F** see Mierlo L *et al.*
- Kongerud J** see Morales-Suarez-Varela M *et al.*
- Korbuly B** see Ursoniu S *et al.*  
see Vernic C *et al.*
- Kordysh E** see Karakis I *et al.*
- Kort de W** see Engberink M *et al.*
- Kouyate B** see Hammer G *et al.*
- Kouyaté B** see Hammer G *et al.*
- Kraemer A** see Baune B *et al.*
- Krajewski-Siuda K** *et al.* Does maternal smoking result from a delay of lung development in foetus?, **A90**
- Kram NR** see van Leeuwen A *et al.*
- Kregzdyte R** see Strumylaite L *et al.*
- Kregzdyte R** *et al.* Handling of missing values in biological monitoring data analysis, **A30**
- Kriz B** see Kyncl J *et al.*
- Kroke A** *et al.* A comparative evaluation of two different approaches to determining adiposity rebound, **A30**
- Kromhout D** see Geleijnse J *et al.*
- Kropp S** see Chang-Claude J *et al.*
- Krynicky R** see Bielska-Lasota M *et al.*
- Kubinova R** see Peasey A *et al.*  
see Pikhart H *et al.*
- Kücherer C** see Poggensee G *et al.*
- Kulig M** *et al.* Cost of illness in relation to disease characteristics in patients with gastro-oesophageal reflux disease over two years, **A31**
- Kulmala I** *et al.* Cosmetic breast implant surgery in Finland—epidemiological study of local complications and postoperative quality of life, **A31**
- Künzli N** see Medina S *et al.*
- Kupper-Nybelen J** see Twardella D *et al.*
- Kurth B** see Neuhauser HK *et al.*
- Kurukulaaratchy RJ** see Morales-Suarez-Varela M *et al.*
- Kyncl J** *et al.* Excess death attributable to influenza in the Czech Republic in 1982–2000, **A31**
- Kyobutungi C** *et al.* Mortality among migrants from Eastern Europe in Germany—a retrospective cohort study, **A32**
- Laaksonen M** *et al.* Associations of childhood socioeconomic environment, adult socioeconomic status, and material resources with self rated health, **A90**
- Labenz J** see Kulig M *et al.*
- Laczka I** see Viragh E *et al.*
- Ladwig K** see Erazo N *et al.*
- Ladwig K** *et al.* The impact of depression on the long term mortality risk of obesity. Results from the monica/cora prospective cohort study, **A32**
- Ladwig KH** see Baumert J *et al.*
- Lahelma E** see Laaksonen M *et al.*
- Lambert H** see Kelahr M *et al.*
- Lampert T** see Ellert U *et al.*
- Landais P** see Le Mignot L *et al.*  
see Richard J *et al.*  
see Said M *et al.*
- Larroque B** *et al.* Behavioural outcome at 3 years of age in very preterm infants: the Epipage cohort study, **A33**  
Delayed development at 1 year in very preterm infants: the Epipage cohort study, **A32**  
Outcome of very preterm birth in the first year. Multiple gestation versus singleton: the Epipage study, **A32**
- Lasheras D** see Vera I *et al.*
- Lassila K** see Kulmala I *et al.*
- Laszewicz W** see Kieltyka A *et al.*
- Laurenti R** *et al.* Accuracy of mortality statistics: the desired goal, **A90**  
Mortality due to non-obstetric causes in women in the expanded pregnancy puerperal cycle, **A33**
- Lauria L** *et al.* Municipal waste and spontaneous abortion, **A91**
- Law G** see Movahedi M *et al.*
- Lazic D** see Knurowski T *et al.*
- Le Bihan C** see Le Mignot L *et al.*
- Le Mignot L** see Said M *et al.*
- Le Mignot L** *et al.* Reliability of patient identification in a multisource web database, **A91**
- Le Pont F** *et al.* Socioeconomic and psychosocial factors associated with perceived health in five French underprivileged urban areas of the Paris region, 2001, **A91**
- Leal M** *et al.* Prenatal care and the relationship between maternal characteristics and birth weight in Rio de Janeiro, Brazil, measured by modified Kotelchuck index, **A33**  
Racial, sociodemographic, and prenatal and childbirth care inequalities in the municipality of Rio de Janeiro, Brazil, 1999–2001, **A92**  
Sociodemographic and prenatal and childbirth care inequalities in the municipality of Rio de Janeiro: impacts on birth weight, **A33**
- Leal MC** see Nogueira da Gama S *et al.*
- Leal R** *et al.* Profile of the epidemic of AIDS in a public general hospital in Rio de Janeiro, Brazil, **A92**
- Leclerc A** see Menvielle G *et al.*
- Leclerc A** *et al.* Widening socioeconomic inequalities in mortality in France?, **A34**
- Leffondre K** see Fortes C *et al.*
- Leite F** see Gomes J *et al.*
- Leite I** see Schramm J *et al.*
- Leite J** see Freitas P *et al.*
- Leite JCC** see Freitas P *et al.*
- Leiva J** see Vizcaino V *et al.*
- Lemos C** *et al.* Evaluation of the tuberculosis surveillance system and prevention and control programme, district of Coria, Extremadura, Spain, 1997–2002, **A92**
- Lenner P** see Manjer J *et al.*
- Leonhäuser I-U** see Macedo S *et al.*
- Lerman Y** see Sadetzki S *et al.*
- Levy A** see Fraser D *et al.*



- Leyland AH** *et al.* Social class and smoking: compositional and contextual effects on the prevalence of cardiovascular disease, **A34**
- Lezáun M** *see* Ugarte M *et al.*
- Liecker B** *see* Becker-Witt C *et al.*  
*see* Brinkhaus B *et al.*
- Liese A** *see* Kroke A *et al.*
- Lilla C** *see* Chang-Claude J *et al.*
- Lima G** *see* Barbosa A *et al.*
- Lima J** *see* Barreto I *et al.*
- Lima JW** *see* Andrade LOM *et al.*  
*see* Santiago AV *et al.*  
*see* Sucupira ACSL *et al.*
- Lima M** *see* Macedo M *et al.*
- Lima V** *et al.* The use of a geographic information system in dengue epidemiology, Campinas, Brazil, 2001–2003, **A92**
- Lima-Costa M** *see* Vorcaro C *et al.*
- Lima-Costa M** *et al.* The structure of self rated health among older adults in Brazil: the Bambuí health and ageing study, **A93**  
Validity of self reported hypertension and its determinants (the Bambuí health and ageing study), **A93**
- Lind T** *see* Kulig M *et al.*
- Lindert J** *et al.* War related health and gender differences, **A34**
- Linhares A** *see* Botelho M *et al.*
- Lipworth L** *see* Kulmala I *et al.*
- Lissowska J** *et al.* Lung cancer and indoor pollution in Poland, **A93**
- Little J** *see* Sharp L *et al.*
- Llano M** *see* Ballesteros J *et al.*
- López A** *see* Barbosa A *et al.*
- López L** *see* Galán I *et al.*
- López-Abente G** *see* Pérez\_Gómez B *et al.*  
*see* Lope V *et al.*
- López-García E** *see* Guallar-Castillón P *et al.*
- López-Sagasetta M** *see* Ugarte M *et al.*
- Loane M** *see* Dolk H *et al.*
- Loew M** *see* Twardella D *et al.*
- Lombardi L** *see* Bianchi F *et al.*
- Lombrail P** *see* Moret L *et al.*
- Lope V** *see* Gavriła D *et al.*  
*see* Suárez B *et al.*
- Lope V** *et al.* Occupation and thyroid cancer risk in Sweden, **A94**
- Lopes C** *see* Almeida S *et al.*  
*see* Bastos F *et al.*  
*see* Duarte-Ramos F *et al.*  
*see* Fonseca M *et al.*  
*see* Gal D *et al.*  
*see* Granja L *et al.*  
*see* Griep R *et al.*  
*see* Lunet N *et al.*
- Lopes C** *et al.* Dietary patterns and risk of myocardial infarction in men, **A34**  
Victimisation and common mental disorders: a cohort study among civil servants in Rio de Janeiro, Brazil, **A35**
- Lopes ES** *see* Kilsztajn S *et al.*
- Lopes J** *see* de Mello R *et al.*
- Lopes L** *see* Ribeiro K *et al.*
- Lopez M** *see* Morales-Suarez-Varela M *et al.*
- Lopez-Gay D** *see* Izarra C *et al.*  
*see* Peña-Rey I *et al.*
- Lopez-Rosales F** *see* Mudender F *et al.*
- Losada M** *see* Barbosa A *et al.*
- Löbel S** *see* Jena S *et al.*
- Lönnqvist J** *see* Haukka J *et al.*
- Löwel H** *see* Baumert J *et al.*  
*see* Ladwig K *et al.*
- Luce D** *see* Leclerc A *et al.*  
*see* Menvielle G *et al.*
- Lucena S** *et al.* Infantile morbidity according to maternal perception and breastfeeding, **A94**
- Luken MEM** *see* van Leeuwen A *et al.*
- Lumbreras-Lacarra B** *et al.* Long term mortality in a cohort of intravenous drug users: 1986–2001, **A35**
- Lumley J** *see* Small R *et al.*  
*see* Taft A *et al.*
- Lunardelli S** *et al.* Maternal periodontal disease and preterm and low birthweight: a population based cross sectional study in southern Brazil, **A94**
- Lunardelli S** *et al.* Enamel defect and preterm and low birthweight: a Brazilian case-control study, **A94**
- Lunet N** *see* Botelho F *et al.*
- Lunet N** *et al.* An appraisal of gastric cancer research in cancer journals, **A95**  
Diet and gastric cancer: a community-based case-control study in Portugal, **A35**
- Luoto R** *see* Kulmala I *et al.*
- Lux AL** *see* Morales-Suarez-Varela M *et al.*
- Macedo M** *et al.* Blood pressure in Portugal. Distribution, awareness, treatment and control of hypertension. PAP study, **A95**  
Food habits of a Portuguese immigrant population living in Germany, **A96**  
Prevalence and distribution of isolated systolic hypertension in Portugal: the PAP study, **A95**
- Macfarlane A** *see* Blondel B *et al.*
- Macho PV** *see* Blanco GC *et al.*
- Maciel-Barbosa A** *see* Alves O *et al.*
- Madarasova-Geckova A** *see* Knurowski T *et al.*
- Madrigal L** *see* Sharp L *et al.*
- Madureira B** *see* Martins AP *et al.*  
*see* Mendes Z *et al.*
- Magalhaes V** *et al.* Eating disorders behaviours: the reliability study of the Portuguese version of a self administered questionnaire, **A96**
- Magalhães C** *see* Andreoli S *et al.*
- Magalhães M** *see* Pina MF *et al.*
- Maguin E** *see* Nishizawa C *et al.*
- Maia J** *see* Seabra A *et al.*
- Maldonado M** *see* Vicentini M *et al.*
- Malfertheiner P** *see* Kulig M *et al.*
- Malyutina S** *see* Peasey A *et al.*  
*see* Pikhart H *et al.*
- Mangia M** *see* Marinacci C *et al.*
- Manjer J** *et al.* Pre-diagnostic levels of sex steroid hormones, prolactin and SHBG: relationship to risk of postmenopausal breast cancer, **A96**
- Manktelow B** *et al.* A comparison of six methods of estimating confidence intervals for an indirectly standardised outcome ratio, **A36**
- Maranha L** *see* Segall-Corrêa A *et al.*
- Maranhão A** *et al.* The evolution of Brazil's child health indicators: 1990–2000, **A97**
- Marchand L** *see* Larroque B *et al.*
- Marchi M** *see* Panopoulou K *et al.*  
*see* Sessa E *et al.*
- Marco R** *see* Accordini S *et al.*  
*see* Cazzoletti L *et al.*
- Marco R** *et al.* Long term predictors of asthma severity: a prospective population based longitudinal study, **A17**
- Marin L** *see* Segall-Corrêa A *et al.*
- Marinacci C** *see* Ancona C *et al.*
- Marinacci C** *et al.* Faecal occult blood test guarantees a higher compliance to colorectal cancer screening than flexosigmoidoscopy: results from a cluster randomised trial, **A36**  
Income inequalities in hospitalisation in Italy, **A36**
- Marinho-Falcão I** *see* Martins AP *et al.*
- Marinkovic J** *see* Jankovic S *et al.*
- Marin-Leon L** *et al.* Epidemiology of traffic accident mortality in the state of São Paulo, Brazil, **A37**  
Mortality due to alcohol dependency in Brazil, **A97**
- Marino C** *et al.* Functional gain in post acute care: patient characteristics and treatment effect, **A37**
- Markovic-Denic L** *see* Jankovic S *et al.*
- Marmot M** *see* Bobak M *et al.*  
*see* Peasey A *et al.*  
*see* Perlman F *et al.*  
*see* Pikhart H *et al.*
- Marqués F** *see* Suárez B *et al.*
- Marques-Vidal P** *et al.* Medicine usage and handling in a sample of Portuguese students, **A97**  
Oral health behaviours and determinants in a sample of Portuguese students, **A98**  
Prevalence of reported hypertension in Portugal: the National Health Survey 1998–1999, **A97**  
Trends and determinants of alcohol consumption in Portugal: results from the National Health Surveys 1995–1996 and 1998–1999, **A98**

- Trends in smoking prevalence in Portugal, **A98**  
 Trends in the prevalence of diagnosed diabetes in Portugal, **A98**  
 Trends in the prevalence of diagnosed hypertension in Portugal, **A38**  
 Trends in the prevalence of overweight and obesity in Portugal, 1995–1999, **A37**
- Marret S** see Larroque B *et al.*  
**Marrugat J** see Munoz M *et al.*  
**Marrugat J et al.** Comparative proportion of emergent cardiovascular risk factors in male patients with myocardial infarction and in the general population with no classical risk factors: the Fortiam study, **A38**
- Marschall B** see Ahrens W *et al.*  
**Marshall T** see Freitas P *et al.*  
**Marten-Mittag B** see Ladwig K *et al.*  
**Marth E** see Daghofer E *et al.*  
**Martínez C** see Vicentini M *et al.*  
**Martínez M** see Pollán M *et al.*  
**Martínez-González MA** see Alonso A *et al.*  
 see Sánchez-Villegas A *et al.*  
**Martínez-González MA et al.** Mediterranean dietary pattern and the risk of obesity: the SUN Study, **A99**  
 Mediterranean diet and risk of hypertension: the SUN Study, **124**
- Martínez-Navarro F** see Lemos C *et al.*  
**Martikainen P** see Laaksonen M *et al.*  
**Martin D** see Andreoli S *et al.*  
**Martin F** see Vioque J *et al.*  
**Martin-Carrasco M** see Ballesteros J *et al.*  
**Martinez-Moratalla J** see Accordini S *et al.*  
**Martins AP et al.** Pharmacoepidemiological approach of *Helicobacter pylori* eradication therapies through community pharmacists and the Portuguese network of sentinel physicians, **A99**
- Martins E** see Azevedo A *et al.*  
**Martins S** see Santos L *et al.*  
**Massari V et al.** A persistent increase in male acute urethritis incidence in France, **A99**
- Masson L** see Sharp L *et al.*  
**Mastroeni S** see Fortes C *et al.*  
**Masuet S** see Munoz M *et al.*  
**Matos F** see Botelho M *et al.*  
**Matos H** see João E *et al.*  
**Matos H et al.** Analysis of a cohort of contacts of leprosy patients in Rio de Janeiro, **A39**
- Matthews S** see Morales-Suarez-Varela M *et al.*  
**Mattos F** see Botelho M *et al.*  
**Matuda N** see Lucena S *et al.*  
**Mänttinen L et al.** Results of the first screening round in the Finnish randomised trial for prostate cancer, **A95**
- Maximiniano N** see Boccolini C *et al.*  
**Mayan O** see Silva S *et al.*  
**Maziak W** see Behrens T *et al.*  
**Mazzaglia G** see Sessa E *et al.*  
**Mazzaglia G et al.** Use of computerised general practice database for epidemiological studies in Italy: a comparative study with the official national statistics, **A100**
- Mazzotti E** see Fortes C *et al.*  
**McLaughlin J** see Kulmala I *et al.*  
**Medeiros L** see Formiga MC *et al.*  
**Medina S et al.** Apheis: air pollution and health European information system, **A39**
- Medronho R** see Braga R *et al.*  
 see Goes S *et al.*  
**Medronho R et al.** Clinical differences among dengue viral serotypes in Rio de Janeiro's 2001/2002 epidemic, **A40**
- Medronho RA et al.** Analysis of spatial distribution of ascariasis, **A40**
- Melbye M** see Ahlgren M *et al.*  
**Melchi F** see Fortes C *et al.*  
**Meli P** see Conti S *et al.*  
**Mello T et al.** Health differentials in rural and urban areas: prevalence of dental caries and malocclusion in the Brazilian context, **A100**
- Melo E** see Mello T *et al.*  
**Melzer D** see Parahyba MI *et al.*  
**Mendes Z et al.** Estimating a prevalence proxy of diabetes mellitus using drug consumption data, **A101**
- Mendonça G** see Magalhães V *et al.*  
**Mendonça D** see Alves O *et al.*  
 see Seabra A *et al.*
- Meneghel S et al.** Epidemiology of suicides in Rio Grande do Sul, **A40**
- Menegolla I et al.** Surveillance of measles, rubella, and exanthema dengue in areas free of indigenous measles and dengue transmission: implications for measles eradication, **A101**
- Menezes J** see João E *et al.*  
**Menezes P** see Sucupira A *et al.*  
**Menvielle G** see Leclerc A *et al.*  
**Menvielle G et al.** Social inequalities and cancer mortality in France, 1975–1990, **A41**
- Merkl J** see Schaefer T *et al.*  
**Merlo J** see Chaix B *et al.*  
**Mesaros S** see Pekmezovic T *et al.*  
**Meyer-Sabellek W** see Kulig M *et al.*  
 see Müller-Nordhorn J *et al.*  
**Michaud JK** see Benito-Garcia E *et al.*  
**Michel-Crosato E** see Biazevic M *et al.*  
**Michel-Crosato E et al.** Relationship among dental caries, social disparities, and daily living impacts in schoolchildren, **A101**
- Miedzybrodzka Z** see Sharp L *et al.*  
**Michelozzi P** see Ancona C *et al.*  
**Mierlo L et al.** Blood pressure response to calcium supplementation: a meta-analysis of randomised controlled trials, **A59**
- Mierzejewska E et al.** Biochemical and genetic determinants of homocysteine metabolism in mothers affected by a neural tube defect pregnancy in Poland, **A41**  
 Lifestyle factors and homocysteine concentration in young adults in cardiovascular diseases prevention, **A102**
- Mignot L** see Richard J *et al.*  
**Mikolajczyk R** see Baune B *et al.*  
**Milagre V** see Marques-Vidal P *et al.*  
**Militino A** see Ugarte M *et al.*  
**Milona M** see Gańczak M *et al.*  
**Minelli G** see Conti S *et al.*  
**Minerba S** see Bisceglia L *et al.*  
**Miriam P** see Vieira E *et al.*  
**Mokdad A** see Brown D *et al.*  
**Molina L** see Marrugat J *et al.*  
**Molloy M** see Khan I *et al.*  
 see O' Rourke K *et al.*  
**Monge R** see Morales-Suarez-Varela M *et al.*  
**Monteiro ALC** see Tayra A *et al.*  
**Monteiro MFG et al.** A case-control study of child survival in shantytown areas (favelas) of Rio de Janeiro, **A102**
- Monteiro S** see Cruz M *et al.*  
**Montes-Martinez A** see Caamaño F *et al.*  
**Monti MC** see Montomoli C *et al.*  
**Montomoli C et al.** Incidence of sudden infant death syndrome in northern Italy, 1990–2000, **A102**
- Moral-de la Rubia J** see Mudender F *et al.*  
**Morales-Suarez-Varela M** see Gonzalez A *et al.*  
 see Mudender F *et al.*  
**Morales-Suarez-Varela M et al.** Occupational risks for mycosis fungoides: results from a case-control study in nine European countries, **A41**  
 Parental smoking and risk for asthma, rhinitis, and atopic dermatitis in children of Valencia, Spain, **A103**  
 Study comparative of the prevalence of atopic dermatitis in Spain based on the study ISAAC phase III, **A103**  
 The impact of AIDS on the health service of Maputo, Mozambique, **A104**  
 The role of tobacco smoking in the prevalence of atopic dermatitis in Spain: ISAAC phase III, **A103**
- Moreira C** see Pereira A *et al.*  
**Moreira E et al.** Epidemiology of chronic pain in Brazil: results of a large population based survey, **A42**
- Moreira F et al.** Smoking among nursing students from the city of Porto, **A104**
- Moreira H** see Nogueira JR *et al.*  
**Moreno C** see Ugarte M *et al.*  
**Moret L et al.** Relationship between patient satisfaction with care and patient age: application of B-spline to multiple linear regression, **A104**
- Morgado V** see Macedo M *et al.*  
**Morarity D** see Brown D *et al.*

- Mota MV** *et al.* Social stratification, intra-urban differences, and mortality, **A104**
- Moura A** *see* Fonseca V *et al.*
- Moura C** *see* Klein C *et al.*  
*see* Rozenfeld S *et al.*
- Moura M** *see* Cohen M *et al.*
- Movahedi M** *et al.* Sub-sites of colorectal cancer and deprivation in Yorkshire and northern regions of the United Kingdom, **A42**
- Moysés M** *et al.* Health care for children in school age and the quality of medical care, **A105**  
The medicalisation of health care for children of school age, **A105**
- Mudender F** *see* Gonzalez A *et al.*  
*see* Morales-Suarez-Varela M *et al.*
- Mudender F** *et al.* Assessment of self efficacy in the prevention of HIV infection among young people/adults of Maputo, Mozambique, **A105**
- Muggeo V** *see* Vigotti M *et al.*
- Muggeo VMR** *see* Bisceglia L *et al.*
- Mugnier C** *see* Le Mignot L *et al.*  
*see* Richard J *et al.*  
*see* Said M *et al.*
- Muijen G** *see* Wark P *et al.*
- Muller E** *see* Biazzevic M *et al.*
- Mun S** *see* O' Rourke K *et al.*
- Munn S** *see* O' Rourke K *et al.*
- Munoz M** *et al.* Health inequalities in coronary patients in southern Europe, **A106**
- Murphy M** *see* Bobak M *et al.*
- Murray C** *see* Brabazon E *et al.*
- Müller O** *see* Hammer G *et al.*
- Müller-Nordhorn J** *et al.* Health related quality of life in patients with hypercholesterolaemia, **A42**
- Naggan L** *see* Fraser D *et al.*
- Naginiene R** *see* Kregzdyte R *et al.*
- Naila S** *see* Segurado A *et al.*
- Nascimento V** *see* Segurado A *et al.*
- Natal S** *see* Santos E *et al.*
- Nathoe H** *see* Heijden G *et al.*
- Nava T** *see* Pires J *et al.*
- Navalon P** *see* Vizcaino V *et al.*
- Navarro C** *see* Sánchez-Villegas A *et al.*
- Navarro F** *see* Vicentini M *et al.*
- Neira P** *et al.* Comprehensive Public Health Improvement Plan for Vallecas: a new experience with citizen participation, **A106**
- Neuhauser H** *see* Ellert U *et al.*
- Neuhauser HK** *et al.* Agreement of Framingham versus SCORE based cardiovascular risk estimations: results of the 1998 German National Health Interview And Examination Survey, **A42**
- Neyroud-Caspar I** *see* Rapiti E *et al.*
- Nguyen J** *see* Moret L *et al.*
- Nicholson A** *see* Bobak M *et al.*
- Nishizawa C** *et al.* Regulation of medicines for the prevention of early oral exposure to ethanol, **A106**
- Nocon M** *see* Kulig M *et al.*
- Nogueira da Gama S** *et al.* Pregnancy in adolescence, associated factors, and perinatal results among postpartum women in Rio de Janeiro, Brazil
- Nogueira J** *see* Macedo M *et al.*
- Nogueira JR** *see* Pedroso MJ *et al.*
- Nogueira JR** *et al.* Occupational morbidity in Oporto, 1998–2003, **A113**
- Novaes H** *see* Sucupira A *et al.*
- Novaes M** *see* Almeida M *et al.*
- Novikov I** *see* Sadezki S *et al.*
- Obel C** *see* Ye G *et al.*
- O'Farrell A** *see* Brabazon E *et al.*
- Okay Y** *see* Grisi S *et al.*  
*see* Maranhão A *et al.*
- Oliveira HB** *see* Marin-Leon L *et al.*
- Oliveira ZAR** *et al.* Factors associated with infant and adolescence mortality, **A107**
- Olsen J** *see* Basso O *et al.*  
*see* Morales-Suarez-Varela M *et al.*  
*see* Ye G *et al.*  
*see* Zhu J *et al.*
- Olsen S** *see* Basso O *et al.*
- Ontoso I** *see* Morales-Suarez-Varela M *et al.*
- Ordobás M** *see* Burgoa M *et al.*  
*see* Cevallos C *et al.*  
*see* Vera I *et al.*
- Orovcanec N** *see* Pavlovska I *et al.*  
*see* Zafirova B *et al.*
- O' Rourke K** *et al.* A comparison of soccer, Gaelic football, and rugby injuries in 409 children under 17 years presenting to an emergency medicine department over a 6 month period, **A43**  
Playground injuries in children under 17 years of age presenting to an emergency medical department, **A107**
- O'Farrell A** *et al.* Profile of victims of violence in a health board region in Ireland who required emergency hospital admission 1997–2001: the increasing association with drunkenness, **A43**  
Trends in hospital admissions for self inflicted injuries among residents from a health board region in Ireland over a 5 year period: the increasing positive association with alcohol, **A107**
- O'Rourke K** *see* Khan I *et al.*
- O'Sullivan K** *see* Raymond N *et al.*
- Osborn J** *see* Lauria L *et al.*
- Otavova M** *see* Kyncl J *et al.*
- Oxman-Martinez J** *see* Gagnon A *et al.*
- Oyen H** *see* Heyden J *et al.*
- Paes-Sousa R** *see* Braga J *et al.*
- Paffrath D** *see* Kulig M *et al.*
- Paiva V** *see* Santos N *et al.*  
*see* Segurado A *et al.*
- Paixão E** *see* Barbosa A *et al.*
- Paixão M** *see* Amaral J *et al.*
- Pajak A** *see* Peasey A *et al.*
- Pajares RM** *see* Alonso A *et al.*  
*see* Martínez-González MA *et al.*
- Pakkanen M** *see* Kulmala I *et al.*
- Paldy A** *see* Medina S *et al.*
- Panek A** *see* Cebulska-Wasilewska A *et al.*
- Panigassi G** *see* Segall-Corrêa A *et al.*
- Panopoulou K** *see* Sessa E *et al.*
- Panopoulou K** *et al.* Health Search, the Research Institute of the Italian Society of General Practice: the creation of a research database in general practice, **A108**
- Paoletti X** *et al.* History of familial cancers and risk of breast cancer: interactions with environmental and reproductive factors, **A108**
- Paolo B** *see* Lissowska J *et al.*
- Parahyba MI** *et al.* Income inequalities and disability in older Brazilians, **A44**
- Parizot I** *see* Bazin F *et al.*
- Pascom A** *see* Santos E *et al.*
- Pasquini P** *see* Fortes C *et al.*
- Passeggi M** *see* Botelho M *et al.*
- Passos M** *see* Medronho R *et al.*
- Patricio K** *see* Cordeiro M *et al.*
- Paul B** *see* Lissowska J *et al.*
- Paul S** *see* Kelaher M *et al.*
- Pavlovska I** *see* Zafirova B *et al.*
- Pavlovska I** *et al.* Risk of developing lung cancer among current and ex-smokers: case–control study, **A108**
- Pawlyk I** *see* Cebulska-Wasilewska A *et al.*
- Paz** *see* Pollán M *et al.*
- Pérez-Farinós N** *et al.* Hospital discharging data of some types of cancer in the community of Madrid, 2001–2002, **A110**
- Pérez-Gómez B** *see* Estirado A *et al.*  
*see* Suárez B *et al.*
- Pérez-Hoyos S** *see* Lumbreras-Lacarra B *et al.*
- Pérez\_Gómez B** *see* Lope V *et al.*
- Pérez\_Gómez B** *et al.* Occupational exposure to chemicals and risk of cutaneous melanoma (CM) in Swedish men, **A110**
- Pérez-Meixeira A** *see* Pollán M *et al.*
- Peasey A** *see* Pikhart H *et al.*
- Peasey A** *et al.* Lipids and binge drinking: is there an association?, **A108**
- Pedroso MJ** *et al.* A review of international studies on electromagnetic fields and health effects, 1979–2003, **A109**
- Peixoto S** *see* Lima-Costa M *et al.*
- Pekmezovic T** *et al.* Association between some habits and multiple sclerosis: a case–control study in Belgrade, **A44**

- Penar A** see Galas A *et al.*  
see Kaim I *et al.*  
see Sochacka-Tatara E *et al.*  
see Steindorf K *et al.*
- Penar A** *et al.* Variability of PM<sub>2.5</sub> exposure related to indoor and outdoor pollution sources in pregnant women, **A109**
- Peña-Rey I** see Izarra C *et al.*  
see Pérez-Farinós N *et al.*
- Peña-Rey I** *et al.* Profile of the drugs consumers in community of Madrid, 2002, **A109**
- Peplies J** see Pigeot I *et al.*
- Peralta P** see Guallar-Castillón P *et al.*
- Pereira A** see Andrade LOM *et al.*  
see Barreto I *et al.*  
see Santiago AV *et al.*  
see Sucupira ACSL *et al.*
- Pereira A** *et al.* Complementary and alternative medicines: use and users in Portugal, **A110**
- Pereira C** see Amaral O *et al.*
- Pereira C** *et al.* Prevalence and social determinants of breastfeeding, **A44**  
Prevalence of abnormal eating behaviours in adolescents, **A45**
- Pereira E** see Amaral J *et al.*
- Pereira M** see Medronho R *et al.*
- Perera FP** see Penar A *et al.*
- Peres K** see Baretta E *et al.*
- Peres M** see Lunardelli S *et al.*  
see Lunardelli S *et al.*
- Perez B** see Gavriła D *et al.*
- Perez F** see Morales-Suarez-Varela M *et al.*
- Perini L** see Conti S *et al.*
- Perlman F** *et al.* Socioeconomic position and mortality in Russia, **A45**
- Perucci C** see Ancona C *et al.*
- Perucci CA** see Arcà M *et al.*  
see Marino C *et al.*
- Pessoa T** see Formiga MC *et al.*
- Petersen J** see Jahn A *et al.*
- Petrauskiene J** see Starkuviene S *et al.*
- Pezzotti P** see Di Lallo D *et al.*
- Pierdomenico F** see Scatigna M *et al.*
- Pietinen P** see Kilkinen A *et al.*
- Pigeot I** *et al.* Obeligs: design for a multicentre prevention and aetiological study on the interaction of lifestyle, diet and genetic factors in children and infants, **A110**
- Pikhart H** see Peasey A *et al.*
- Pikhart H** *et al.* The measure of quality of life in a retired population in two countries of central and Eastern Europe: CASP-19, **A45**
- Pilla M** see Fortes C *et al.*
- Pimenta J** see Azevedo A *et al.*
- Pina M** see Almeida S *et al.*  
see Alves S *et al.*
- Pina MF** *et al.* Geographical distribution of AIDS cases in Rio de Janeiro city, 1989–2000, **A111**
- Pinheiro C** see Barbosa A *et al.*  
see Freitas P *et al.*
- Pinheiro LC** see Duarte-Ramos F *et al.*
- Pinho R** see Andreoli S *et al.*
- Pinto A** see Santos L *et al.*
- Pinto M** see Herdeir M *et al.*
- Pinto R** see Andreoli S *et al.*
- Pires J** *et al.* Barriers for identifying and notification of child abuse by paediatricians from Porto Alegre, Brazil, **A45**
- Pittrow D** see Allenberg J *et al.*
- Plato N** see Estirado A *et al.*  
see Lope V *et al.*  
see Pérez\_Gómez B *et al.*
- Platt MJ** see Cans C *et al.*
- Platt R** see Gagnon A *et al.*
- Pocock SJ** see Morales-Suarez-Varela M *et al.*
- Poggensee G** *et al.* Transmission of resistant HIV in Germany: results from the HIV seroconverter study of the Robert Koch Institute, **A1**
- Pollán M** see Estirado A *et al.*  
see Lope V *et al.*  
see Pérez\_Gómez B *et al.*
- Pollán M** *et al.* Surveillance of exposure to environmental pollutants using biomarkers in two health areas of Madrid: a pilot study, **A46**
- Pollán M** see Gavriła D *et al.*
- Polo A** see Di Lallo D *et al.*
- Polónia J** see Herdeiro M *et al.*
- Ponce E** see Vioque J *et al.*
- Pool J** see Bergman G *et al.*
- Popa J** see Montomoli C *et al.*
- Pope A** see Medina S *et al.*
- Popiela T** see Steindorf K *et al.*
- Popov T** see Cebulska-Wasilewska A *et al.*
- Portela M** see Schramm J *et al.*
- Postema K** see Bergman G *et al.*
- Potiriadis M** see Dunt D *et al.*
- Prel J** see Rosenbauer J *et al.*
- Prel J** *et al.* Type 1 diabetes in children and socioeconomic factors at areal level in north Rhine-Westphalia, Germany, **A18**
- Prochazka B** see Kyncl J *et al.*
- Pukkala E** *et al.* Multilevel register linkages—a powerful tool in studies on large changes in society and cancer risk, **A111**
- Puscher J** see Poggensee G *et al.*
- Queirós L** *et al.* Self image and physical appearance in schoolgirls, **A111**
- Queisser-Luft A** *et al.* Childhood cancer and major malformations: a population-based analysis of 33 254 newborns in the Mainz birth registry, **A112**
- Quinn F** see Khan I *et al.*  
see O' Rourke K *et al.*
- Quiros A** see Morales-Suarez-Varela M *et al.*
- Rabczenko D** see Bielska-Lasota M *et al.*
- Rahkonen O** see Laaksonen M *et al.*
- Raitanen J** see Kulmala I *et al.*
- Ramadani N** see Gashi L *et al.*
- Ramadani N** *et al.* Reforming healthcard in Kosova: luxury or necessity?, **A112**
- Ramalhinho V** see Macedo M *et al.*
- Ramalho W** see Braga J *et al.*
- Ramalho W** *et al.* The development of geoprocessing and spatial data analysis for health applications in Brazil, **A112**
- Rameš J** see Bencko V *et al.*
- Ramírez R** see Burgoa M *et al.*  
see Cevallos C *et al.*  
see Gutiérrez A *et al.*
- Ramirez R** see Gonzalez E *et al.*
- Ramos E** *et al.* Epitteen: assembling a Portuguese cohort of children born in 1990, **A112**
- Ramos J** see de Mello R *et al.*
- Ramos Jr A** see Cavalcante MS *et al.*
- Ramos P** see Formiga M *et al.*
- Ramos-Aceitero JM** see Lemos C *et al.*
- Rapiiti E** *et al.* Determinants of prognosis in metastatic breast cancer, **A46**
- Rasmussen F** *et al.* Young age at adiposity rebound is strongly associated with the risk of overweight and obesity in adolescence: the Compass Study, **A46**
- Raspe F** see Heidrich J *et al.*
- Raymond N** see Khunti K *et al.*
- Raymond N** *et al.* Routinely collected laboratory data in renal disease epidemiology: Coventry renal failure project, **A47**
- Razum O** see Jahn A *et al.*  
see Kyobutungi C *et al.*
- Reichenheim M** *et al.* Parental violence and the occurrence of severe and acute malnutrition in childhood, **A47**
- Reinthalder F** see Daghofer E *et al.*
- Reis A** see Santos E *et al.*
- Reis A** *et al.* Aids mortality pattern in Brazil, 1983–1999, **A113**
- Restitutti M** see Lima V *et al.*
- Rettig R** see Völzke H *et al.*
- Ribeiro A** see Klein C *et al.*  
see Rozenfeld S *et al.*
- Ribeiro K** *et al.* Social inequalities and trends in childhood leukaemia mortality in Brazil, 1980–2000, **A47**
- Richard J** see Le Mignot L *et al.*  
see Said M *et al.*
- Richard J** *et al.* GIS integration in nephrology: a SIGNe, **A47**
- Rijkers G** see Zielhuis G *et al.*
- Rijo A** see Pereira C *et al.*
- Ring J** see Schaefer T *et al.*
- Risch A** see Chang-Claude J *et al.*
- Ritvanen A** see Artama M *et al.*

- Rizzo L** see Leal R *et al.*
- Robert-Bobée I** see Leclerc A *et al.*
- Robinson D** see Völzke H *et al.*
- Rocha F** see Vorcaro C *et al.*
- Roche E** see Vioque J *et al.*
- Rocheleau L** see Haiek L *et al.*
- Rodero I** see Burgoa M *et al.*  
see Vera I *et al.*
- Rodríguez-Artalejo F** see Guallar-Castillón P *et al.*  
see Suárez B *et al.*
- Rodríguez-Barranco M** see Sánchez-Villegas A *et al.*
- Rodrigues L** see Almeida M *et al.*
- Rodrigues N** see Tayra A *et al.*
- Rodrigues NML** see Tayra A *et al.*
- Rodrigues R** see Azevedo A *et al.*
- Rodriguez E** see Garcia N *et al.*  
see Neira P *et al.*  
see Vera I *et al.*
- Rofer S** see Lope V *et al.*
- Rohlfis I** see Munoz M *et al.*
- Roll S** see Englert H *et al.*  
see Jena S *et al.*
- Ronellenfitch U** see Kyobutungi C *et al.*
- Rosenbauer J** see Icks A *et al.*  
see Prel J *et al.*
- Rosenbauer J et al.** Spatial associations between the incidence of type 1 diabetes mellitus and socioeconomic indicators: an ecological study in Germany, **A113**
- Rossi P** see Marinacci C *et al.*
- Rossi P et al.** Randomised controlled trial to improve compliance to colorectal cancer screening: immunochemical faecal occult blood test is better than Guaiaco test, **A25**
- Rossi PG** see Farchi S *et al.*
- Roth C et al.** Migrant women, bilingual health advocacy, and antenatal HIV testing: a qualitative study (for European perinatal epidemiology network meeting), **A48**
- Rothenbacher D** see Twardella D *et al.*
- Röder S et al.** Automatic re-coding of variable values for pooled meta-analysis of epidemiological data, **A48**
- Rozenfeld S** see Klein C *et al.*
- Rozenfeld S et al.** Medical use profile of a Brazilian retiree population in Rio de Janeiro, Brazil, **A48**
- Ruiz E** see Tayra A *et al.*
- Ruiz EAC** see Tayra A *et al.*
- Ruiz EC** see Santos NJS *et al.*
- Ruiz T** see Cordeiro M *et al.*  
see Corrente J *et al.*
- Russo A** see Ancona C *et al.*  
see Marinacci C *et al.*
- Ryll A** see Trautner C *et al.*
- Rysel S** see Kregzdyte R *et al.*
- Rzehak P** see Behrens T *et al.*
- Sánchez-Villegas A** see Alonso A *et al.*  
see Martínez-González MA *et al.*
- Sánchez-Villegas A et al.** Olive oil consumption and incidence of obesity: the SUN project, **A114**
- Sánchez-Villegas A et al.** Validation of self reported diagnosis of diabetes mellitus Type 2 in the Spanish survey (DINO): overall agreement and predictive values, **A49**
- Sadetzki S et al.** Genotyping of patients with sporadic and radiation associated meningiomas, **A49**
- Saegeer E** see Medina S *et al.*
- Said M** see Le Mignot L *et al.*  
see Richard J *et al.*
- Said M et al.** Multi-sources information system and epidemiological follow up of chronic disease, **A69**
- Saitto C** see Arcà M *et al.*  
see Marino C *et al.*
- Salgado L** see João E *et al.*
- Saliba O** see Michel-Crosato E *et al.*
- Samani F** see Mazzaglia G *et al.*
- Sampaio M** see Segall-Corrêa A *et al.*
- Sampogna F** see Fortes C *et al.*
- Sanchez S** see Garcia N *et al.*
- Sancho G** see Lemos C *et al.*
- Sandall J** see Roth C *et al.*
- Sanders L** see Zielhuis G *et al.*
- Sankila R** see Kilkinen A *et al.*
- Santander R** see Morales-Suarez-Varela M *et al.*
- Santiago A** see Andrade LOM *et al.*  
see Barreto I *et al.*  
see Santiago AV *et al.*  
see Sucupira ACSL *et al.*
- Santiago AV** see Andrade LOM *et al.*  
see Sucupira ACSL *et al.*
- Santiago AV et al.** The sobral survey on health, education and quality of life of children aged 5–9 years in urban settings of Sobral, Ceara, Brazil, 1999–2000: use of the health services, **A114**
- Santos A** see Azevedo A *et al.*  
see Lopes C *et al.*  
see Pollán M *et al.*
- Santos AC** see Duarte-Ramos F *et al.*  
see Gal D *et al.*
- Santos AC et al.** Gender modifies the effect of socioeconomic factors in the occurrence of metabolic syndrome, **A114**
- Santos C** see Pereira C *et al.*
- Santos D** see Moreira E *et al.*
- Santos E** see Cruz M *et al.*  
see Reis A *et al.*
- Santos E et al.** AIDS hospital inpatients profile in Brazil, **A49**
- Santos E et al.** Assessment of an integrated curriculum on evaluation of HIV/AIDS control programmes: a promising Brazilian experience, **A115**
- Santos L et al.** Aetiology and clinical course of sporadic cases of bacterial meningitis, **A115**
- Santos L et al.** The study of aseptic meningitis using virus detection by real time RT-PCR, **A49**
- Santos M** see Vicentini M *et al.*
- Santos N** see Segurado A *et al.*  
see Tayra A *et al.*
- Santos N et al.** Reasons to be tested and risk perception of HIV positive men who have sex with women, **A50**
- Santos NJS** see Tayra A *et al.*
- Santos NJS et al.** Profile of testing and counselling centres in the state of São Paulo, **A115**
- Santric-Milicevic M** see Jankovic S *et al.*
- Sanz G** see Marrugat J *et al.*
- Sanz RA** see Alonso TV *et al.*
- Sappino A** see Rapiiti E *et al.*
- Saraiva M** see Cortez S *et al.*
- Saraiva M et al.** Effect of early working on body mass index of young adults: a cohort study, **A50**
- Saraiva MCP et al.** Low birth weight and small for gestational age and dental caries in primary dentition in a United States population, **A50**
- Sarno E** see Matos H *et al.*
- Sarosi A** see Viragh E *et al.*
- Sarov B** see Karakis I *et al.*
- Sarría-Santamera A** see Pérez-Farinós N *et al.*
- Sartor F et al.** Cancer clustering around an illicit industrial waste dump, **A115**
- Saucier J** see Gagnon A *et al.*
- Saurel-Cubizolles M** see Leclerc A *et al.*
- Sauvaget C et al.** Joint effect of radiation and diet on cancer risk, **A116**
- Savov S** see Turnovska T *et al.*
- Scatigna M** see Panopoulou K *et al.*  
see Sessa E *et al.*
- Scatigna M et al.** Sociodemographic determinants of repeated medical terminations of pregnancy (MTP), **A116**
- Schaefer G** see Englert H *et al.*
- Schaefer T et al.** Prevalence and risk factors of common naevi in the general population: results of the Kora Survey 2000, **A51**
- Scherbaum N** see Baune B *et al.*
- Schifano P** see Marinacci C *et al.*
- Schilder A** see Zielhuis G *et al.*
- Schill W** see Ahrens W *et al.*
- Schlaefler K** see Queisser-Luft A *et al.*
- Schlehofer B** see Berg G *et al.*
- Schmidt M** see Steindorf K *et al.*
- Schneider A** see Baumert J *et al.*
- Schouten E** see Engberink M *et al.*  
see Geleijnse J *et al.*
- Schramm J et al.** Overview of results from the Global Burden Of Disease Study in Brazil, 1998, **A51**

- Schubert H** see Rapiti E *et al.*  
**Schuz J** see Berg G *et al.*  
**Schwabe U** see Kulig M *et al.*  
**Schwahn C** see Völzke H *et al.*  
**Schwartz P** see Montomoli C *et al.*  
**Seabra A** *et al.* Influence of demographic-biological and sociocultural determinants in children's and youngsters' physical activity levels, **A116**  
**Segall-Correa A** see Barreto I *et al.*  
**Segall-Corrêa A** *et al.* Family food insecurity: scale validation in Brazil, **A51**  
**Segall-Correa AM** see Andrade LOM *et al.*  
 see Santiago AV *et al.*  
 see Sucupira ACSL *et al.*  
**Segurado A** see Santos N *et al.*  
**Segurado A** *et al.* Clinical care of men living with HIV/AIDS, who have sex with women, in São Paulo, Brazil, **A117**  
 Sexual abuse among men living with HIV/AIDS in São Paulo, Brazil, **A52**  
**Selim D** see Becker-Witt C *et al.*  
 see Brinkhaus B *et al.*  
 see Jena S *et al.*  
**Semeraro V** see Bisceglia L *et al.*  
**Sera F** see Fortes C *et al.*  
**Serrano O** see Vizcaino V *et al.*  
**Sessa E** see Mazzaglia G *et al.*  
 see Panopoulou K *et al.*  
**Sessa E** *et al.* Low back pain in general practice: patient profile, **A117**  
**Seth R** see Cotton S *et al.*  
**Severo M** see Granja L *et al.*  
 see Santos L *et al.*  
**Sevon T** see Klemetti R *et al.*  
**Sforza C** see Ancona C *et al.*  
 see Arcà M *et al.*  
**Shaham J** *et al.* Breast cancer in relation to occupation and biomarkers, **A117**  
**Shala S** see Fejza H *et al.*  
**Sharp L** see Cotton S *et al.*  
**Sharp L** *et al.* Exploring the effects of the MTHFR c677T polymorphism on the risk of clubfoot: an analysis of case parent triads in the UK, **A1**  
 The relative impact of risk factors for colorectal cancer in a northern European population: results from a case-control study in Scotland, **A52**  
**Sheehan J** see O' Rourke K *et al.*  
**Shoeps D** see Almeida M *et al.*  
**Shraga M** see Zaitseva T *et al.*  
**Sichieri R** see Fonseca V *et al.*  
**Siebert E** see Heidrich J *et al.*  
**Siezen CLE** see van Leeuwen A *et al.*  
**Sillberg K** see Ursoniu S *et al.*  
 see Vernic C *et al.*  
**Silva A** see Cortez S *et al.*  
 see Macedo M *et al.*  
 see Saraiva M *et al.*  
**Silva A** *et al.* The impact of the Family Health Programme in the municipality of Sobral, Brazil: an analysis on the evaluation of children's health under 5 years of age, 1995–2002, **A52**  
**Silva AAM** see Almeida S *et al.*  
**Silva KS** *et al.* Social support scale: test–retest reliability in Brazilian pregnant women, **A118**  
**Silva M** see Braga J *et al.*  
**Silva M** *et al.* Incidence of stroke in urban and rural populations: a meta-analysis of observational studies, **A52**  
**Silva S** see João E *et al.*  
 see Tayra A *et al.*  
**Silva S** *et al.* Biomonitoring of genotoxic risk in workers in a rubber factory, **A118**  
**Silveira K** see Formiga MC *et al.*  
**Silveira N** see Lima V *et al.*  
**Simas V** see Pires J *et al.*  
**Simões J** see Santos L *et al.*  
**Sipetic-Grujicic S** see Jankovic S *et al.*  
**Siqueira A** see Almeida M *et al.*  
**Sjöström M** see Grjibovski A *et al.*  
**Skjærven R** see Basso O *et al.*  
**Small R** see Taft A *et al.*  
**Small R** *et al.* Assessing women's views of maternity care 1989–2000: the voices of immigrant Australian women of non-English speaking backgrounds, **A53**  
**Smith G** see Kelaher M *et al.*  
**Smith GD** see Andersen AMN *et al.*  
**Smolen J** see Benito-Garcia E *et al.*  
**Smyth E** see Caamaño F *et al.*  
**Sochacka-Tatara E** see Kaim I *et al.*  
 see Penar A *et al.*  
**Sochacka-Tatara E** *et al.* Assessment of nutrition among women before pregnancy: Krakow study, **A53**  
**Solimini R** see Conti S *et al.*  
**Somogyi S** see Poggensee G *et al.*  
**Sonntag F** see Müller-Nordhorn J *et al.*  
**Soria B** see Vioque J *et al.*  
**Sørensen T** see Ahlgren M *et al.*  
**Sousa S** *et al.* Violence in Portuguese adolescents: social and behavioural determinants, **A118**  
**Sousa-Guerreiro A** see Martins AP *et al.*  
**Southern D** see Dunt D *et al.*  
**Souza A** see Gomes J *et al.*  
**Souza C** see Formiga MC *et al.*  
**Souza J** see Lucena S *et al.*  
**Souza M** see Moreira E *et al.*  
**Sowa A** see Sochacka-Tatara E *et al.*  
**Soyseth V** see Morales-Suarez-Varela M *et al.*  
**Spengler JD** see Penar A *et al.*  
**Spinelli A** see Di Lallo D *et al.*  
 see Lauria L *et al.*  
**Spix C** see Queisser-Luft A *et al.*  
**Šram R** see Cebulska-Wasilewska A *et al.*  
**Stanger E** see Gagnon A *et al.*  
**Starinsky S** see Sadetzki S *et al.*  
**Starkuviene S** *et al.* Mortality from external causes in Lithuania: the effect of educational level, **A53**  
**Starzewski J** see Bielska-Lasota M *et al.*  
**Stefan K** see Turnovska T *et al.*  
**Stegmaier C** see Twardella D *et al.*  
**Steindorf K** *et al.* Lifetime occupational and recreational physical activity and risks of colon and rectal cancer: a case-control study in Poland, **A54**  
**Stenman U** see Määttänen L *et al.*  
**Stewart D** see Gagnon A *et al.*  
**Stillfried Dv** see Trautner C *et al.*  
**Stoilka M** see Turnovska T *et al.*  
**Stojsavljevic N** see Pekmezovic T *et al.*  
**Stolte M** see Kulig M *et al.*  
**Stolz G** see Queisser-Luft A *et al.*  
**Stone M** see Khunti K *et al.*  
**Straatman H** see Zielhuis G *et al.*  
**Straetmans M** see Zielhuis G *et al.*  
**Stramba-Badiale M** see Montomoli C *et al.*  
**Strassburger K** see Icks A *et al.*  
**Streppel M** see Mierlo L *et al.*  
**Strine T** see Brown D *et al.*  
**Stritzky Bv** see Allenberg J *et al.*  
**Struchiner C** see Matos H *et al.*  
**Strumlylaite L** *et al.* Respiratory health of children and home environment, **A54**  
**Stuenzner D** see Daghofer E *et al.*  
**Suárez B** see Estirado A *et al.*  
 see Lope V *et al.*  
 see Pérez\_Gómez B *et al.*  
**Suárez B** *et al.* The *Prestige* oil spill: acute health effects in cleaning teams from Asturias and Cantabria, Spain, **A118**  
**Sucupira A** see Barreto I *et al.*  
**Sucupira A** *et al.* School failure and life conditions in children aged 7–10 years old, Sobral, Ceará, Brazil, **A54**  
**Sucupira ACS** see Andrade LOM *et al.*  
 see Santiago AV *et al.*  
**Sucupira ACSL** *et al.* The Sobral survey on health, education and quality of life of children aged 5–9 years in urban settings of Sobral, Ceará, Brazil, 1999–2000: social and environmental conditions, **A119**  
**Sugahara GTL** see Kilsztajn S *et al.*  
**Sugano H** see Tayra A *et al.*

- Supernant K** see Larroque B *et al.*
- Swiercz A** see Bielska-Lasota M *et al.*
- Swinkels D** see Engberink M *et al.*
- Szafraniec K** see Kielyka A *et al.*  
see Szurkowska M *et al.*
- Szafraniec K** *et al.* Health impact assessment of air pollution: experience in Poland, **A119**
- Szamatulska K** see Mierzejewska E *et al.*
- Szamatulska K** *et al.* Basic perinatal indicators in Poland, **A55**  
Coronary risk factors and birth weight of cohort of young adults born in Warsaw: preliminary data, **A55**
- Szeszenia-Dabrowska N** see Lissowska J *et al.*
- Szostak-Wegierek D** see Szamatulska K *et al.*
- Sztajn bok S** *et al.* The impact of water quality on acute diarrhoea in two neighbourhoods in the municipality of Taboão da Serra, São Paulo, Brazil, **A119**
- Szurkowska M** *et al.* The prevalence of the metabolic syndrome and cardiovascular disease risk using three proposed definitions, **A55**
- Szwarcwald C** see Brito A *et al.*  
see Nogueira da Gama S *et al.*
- Szwarcwald C** *et al.* Socioeconomic inequalities in health state in Brazil: results of the World Health Survey, **A55**
- Szych Z** see Gańczak M *et al.*
- Taeger D** see Behrens T *et al.*
- Tafforeau J** see Demarest S *et al.*  
see Heyden J *et al.*
- Taft A** *et al.* MOSAIC (Mothers' Advocates In The Community): a randomised community intervention trial in general practice to reduce partner abuse and depression among recent mothers, **A56**
- Takkouche B** see Caamaño F *et al.*
- Tammela T** see Määttänen L *et al.*
- Tancredi M** see Tayra A *et al.*
- Tancredi MV** see Santos NJS *et al.*  
see Tayra A *et al.*
- Tancredi MV** *et al.* Trends in the AIDS epidemic among injecting drug users in the city of São Paulo, **A120**
- Tavares M** see Toporcov T *et al.*
- Tayra A** *et al.* Coverage and compliance for hepatitis B vaccine among STD patients of the São Paulo state health department STD/AIDS referral and training centre (CRT-DST/AIDS) in 2001, **A121**  
Epidemiological surveillance of congenital syphilis in the state of São Paulo 1989–2000, **A120**  
Exposure category and schooling in cases of AIDS in São Paulo, Brazil, **A120**
- Tayra A** see Santos NJS *et al.*
- Tedder Y** see Grijbovski A *et al.*
- Teixeira J** see Silva S *et al.*
- Tepohl G** see Allenberg J *et al.*
- Terra V** see Grisi S *et al.*
- Terschüren C** see Behrens T *et al.*
- Terzic-Supic Z** see Jankovic S *et al.*
- Thorand B** see Baumert J *et al.*
- Tiihonen J** see Haukka J *et al.*
- Tindó H** *et al.* Gender differences in tuberculosis in Rio, Brazil, **A56**
- Tirmarche M** see Baysson H *et al.*
- Tobías A** see Galán I *et al.*
- Tobiasz-Adamczyk B** see Knurowski T *et al.*
- Tobiasz-Adamczyk B** *et al.* Gender related determinants of mortality patterns in the Polish elderly, **A56**
- Tocaceli V** see Conti S *et al.*
- Tolaj I** see Fejza H *et al.*
- Tolonen H** *et al.* Prevalence, awareness, and treatment of hypercholesterolaemia in 32 populations: results from the WHO MONICA project, **A57**
- Tomazelli J** see Cohen M *et al.*
- Tomé-Otero M** see Caamaño F *et al.*
- Tony F** see Lissowska J *et al.*
- Toporcov T** *et al.* Habitual intake of fat foods and risk for oral cancer, **A121**
- Topp M** see Cans C *et al.*
- Tormo MJ** see Sánchez-Villegas A *et al.*
- Torres J** see Silva S *et al.*
- Toubiana L** see Richard J *et al.*
- Trampisch HJ** see Allenberg J *et al.*
- Trautner C** see Druenkler M *et al.*
- Trautner C** *et al.* Reliability of diagnoses coded by office based physicians in Germany, **A57**
- Travassos C** see Castro M *et al.*
- Turnovska T** *et al.* Anthropometric comparisons between children of Romany and Bulgarian origins, **A121**  
Anthropometric nutritional status among adolescents, **A121**
- Twardella D** *et al.* The benefit of smoking cessation in patients with coronary heart disease: estimates based on self reported smoking data and serum nicotine measurements, **A57**  
The diagnosis of a smoking related disease is a prominent trigger for smoking cessation in the general population, **A122**
- Uchôa E** see Lima-Costa M *et al.*  
see Vorcaro C *et al.*
- Ugarte M** *et al.* A historical cohort study to estimate occupational mortality risks in Navarra, **A58**
- Ursoniu S** see Vernic C *et al.*
- Ursoniu S** *et al.* Drinking behaviours among high school students from Timisoara, **A122**
- Valencia I** see Braga R *et al.*  
see Medronho R *et al.*  
see Medronho RA *et al.*
- Valente J** see Schramm J *et al.*
- Valenzuela J** see Gonzalez E *et al.*
- Valero J** see Fernández C *et al.*
- Valle V** see Marrugat J *et al.*
- Van den Brandt A** see Wark P *et al.*
- van den Heuvel W** see Knurowski T *et al.*
- Van der Heyden J** see Demarest S *et al.*
- van Dijk J** see Knurowski T *et al.*
- van Kranen HJ** see van Leeuwen A *et al.*
- van Leeuwen A** *et al.* The association between fish consumption and the occurrence of colorectal adenomas is modified by genetic polymorphisms in PPAR $\alpha$ , COX-2 and CPLA2 genes, **A122**
- Van Oyen H** see Demarest S *et al.*
- Vartiainen E** see Kilkinen A *et al.*
- Vasconcelos L** see Pereira C *et al.*
- Veer P** see Wark P *et al.*
- Vega-Olías F** see Lemos C *et al.*
- Veiga N** see Pereira C *et al.*
- Velasco S** see Vicentini M *et al.*
- Vera I** see Burgoa M *et al.*  
see Fernández C *et al.*
- Vera I** *et al.* Occupational brucellosis outbreak among meat packing plant workers in Madrid, Spain, **A123**  
Trends in hepatitis A outbreaks in the region of Madrid, Spain, from 1998 to 2003, **A123**
- Vera P** see Segurado A *et al.*
- Verkooijen H** see Rapiti E *et al.*
- Vernic C** see Ursoniu S *et al.*
- Vernic C** *et al.* Smoking patterns among high school students from Timisoara, **A123**
- Viacava F** see Szwarcwald C *et al.*
- Vianna R** see Segall-Corrêa A *et al.*
- Vicentini M** *et al.* An outbreak of gastroenteritis in a nursing home of the community of Madrid, Spain, 2004, **A77**
- Vichi M** see Conti S *et al.*
- Victoria C** see Meneghel S *et al.*
- Vieira E** see Pires J *et al.*
- Vieira E** *et al.* The choice of surgical sterilisation among Brazilian couples provided by the public health system, **A59**
- Vigotti M** *et al.* The effect of birthplace on heat tolerance and mortality in Italy, 1980–89, **A59**
- Vigotti MA** see Bisceglia L *et al.*
- Villarreal F** see Neira P *et al.*
- Viloria LJ** see Suárez B *et al.*
- Vintén J** see Carreira M *et al.*
- Vioque J** Risk of gastric cancer in relation to tobacco smoking, type of alcoholic beverage and coffee consumption in Valencia, Spain: a case–control study, **A124**  
Beer and obesity: a cross sectional study, **A124**
- Vioque J** *et al.* Risk of oesophageal cancer in relation to consumption of tobacco smoking, type of alcoholic beverage and coffee consumption in Valencia, Spain: a case–control study, **A59**  
The relationship between self reported diabetes and coffee and alcohol consumption among adults in Valencia, Spain, **A60**

- Viragh E** *et al.* Health effects of occupational exposure to fluorine and its compounds, **A124**
- Viragh H** see Viragh E *et al.*
- Virtamo J** see Kilkkinen A *et al.*
- Virtanen M** see Kilkkinen A *et al.*
- Vizcaino F** see Vizcaino V *et al.*
- Vizcaino V** *et al.* Prevalence and risk factors of lens opacities in the elderly in Cuenca, Spain, **A99**
- Vlajinac H** see Jankovic S *et al.*
- Vorcaro C** *et al.* The burden of social phobia in a Brazilian community and its relationship with socioeconomic circumstances: the Bambui study, **A125**
- Völler H** see Müller-Nordhorn J *et al.*
- Völzke H** *et al.* Interaction between factor V Leiden and serum LDL cholesterol is associated with prevalent non-acute carotid atherosclerosis and severe coronary artery disease, **A60**
- Wahlbeck K** see Haukka J *et al.*
- Wahoush O** see Gagnon A *et al.*
- Wahrendorf J** see Queisser-Luft A *et al.*  
see Steindorf K *et al.*
- Waldman E** see Antunes J *et al.*  
see Mello T *et al.*
- Waldman EA** see Casagrande ST *et al.*  
see Tancredi MV *et al.*
- Waldren C** see Sauvagat C *et al.*
- Waqar A** see Kelaher M *et al.*
- Wark P** *et al.* Consumption of fruits and vegetables, and expression of the mismatch repair gene hmlh1 in human colorectal cancer: a prospective study, **A2**  
Diet, lifestyle, and advanced and non-advanced colorectal adenomas in men, **A60**
- Waterhouse L** see Morales-Suarez-Varela M *et al.*
- Wegscheider K** see Jena S *et al.*  
see Müller-Nordhorn J *et al.*
- Weijnenberg M** see Wark P *et al.*
- Weiland S** see Behrens T *et al.*
- Weiss J** see Ahrens W *et al.*
- Werneck G** see Lopes C *et al.*
- Werneck-Barroso E** see Tindó H *et al.*
- West R** *et al.* Mortality, morbidity and quality of life following cardiac rehabilitation; results of a multicentre randomised controlled trial, **A61**
- Whyatt RM** see Penar A *et al.*
- Wichmann H** see Schaefer T *et al.*
- Wiecheć A** see Cebulska-Wasilewska A *et al.*
- Wiesel A** see Queisser-Luft A *et al.*
- Wijhe G** see Wark P *et al.*
- Wilczynska U** see Lissowska J *et al.*
- Willett W** see Wark P *et al.*
- Williams S** see Raymond N *et al.*
- Willich S** see Becker-Witt C *et al.*  
see Englert H *et al.*  
see Jena S *et al.*  
see Kulig M *et al.*  
see Müller-Nordhorn J *et al.*
- Willich SN** see Brinkhaus B *et al.*
- Windler E** see Müller-Nordhorn J *et al.*
- Wingren G** see Morales-Suarez-Varela M *et al.*
- Winters J** see Bergman G *et al.*
- Wohlfahrt J** see Ahlgren M *et al.*
- Wolfe F** see Benito-Garcia E *et al.*
- Wolff B** see Völzke H *et al.*
- Wolffenbuttel K** see Santos NJS *et al.*
- Wong A** see Tayra A *et al.*
- Wu K** see Wark P *et al.*
- Wuesten B** see Twardella D *et al.*
- Wysocki M** see Gebaska-kuczerowska A *et al.*
- Ye G** *et al.* Coffee consumption and cigarette smoking during pregnancy and behavioural problems in offspring: prospective study within a Danish birth cohort, **A61**
- Yelland J** see Small R *et al.*
- Yepez E** see Morales-Suarez-Varela M *et al.*
- Yepiskoposyan L** see Hakobyan M *et al.*
- Yepiskoposyan L** *et al.* Newborns' physique in Armenia, 1980–2000, **A61**
- Yngve A** see Grjibovski A *et al.*
- Young D** see Dunt D *et al.*
- Youssef R** *et al.* Ever use of contraception and probability of continuation: community based survey of women in the south of Jordan, **A61**
- Ypiranga M** see Abreu L *et al.*
- Yunesian M** see Hosseinpoor A *et al.*
- Yuyama L** see Segall-Corrêa A *et al.*
- Zafirova B** see Pavlovska I *et al.*
- Zafirova B** *et al.* Influence of stroke type and some risk factors on rehabilitation of hemiplegic patients, **A126**
- Zaitseva T** *et al.* Lung cancer incidence among men in urban areas in the northwest of Russia, **A62**
- Zajmi D** see Gashi L *et al.*
- Zeeegers M** see Mierlo L *et al.*
- Zeitlin J** see Blondel B *et al.*
- Zhu J** *et al.* Shift work, job stress and late fetal loss: a study based on the national birth cohort in Denmark, **A62**
- Ziegler H** see Twardella D *et al.*
- Zielhuis G** *et al.* Interaction between immunological status and eustachian tube dysfunction in the prediction of recurrent otitis media with effusion in children, **A62**
- Ziese T** see Ellert U *et al.*
- Zitek K** *et al.* The epidemiology of a post-floods leptospirosis in the Czech Republic, **218**
- Zorrilla B** see Galán I *et al.*
